# Supplementary material for: A general stereoselective enamine mediated alkylation of α-substituted aldehydes
Source: Royal Society of Chemistry journal article supplement (doi:10.1039/c2cc17482k), 2012-01-01

# A General Enamine Mediated Alkylation of $\alpha$ -Substituted Aldehydes.

Andrea Gualandi, Diego Petruzzello, Enrico Emer and Pier Giorgio Cozzi\*

Dipartimento di Chimica “G. Ciamician” ALMA MATER STUDIORUM Università di Bologna, Via Selmi  
2, 40126 Bologna, Italy Fax: (+)39-051-2099456; Tel 0039-051-2099511,  
E-mail: [piergiorgio.cozzi@unibo.it](mailto:piergiorgio.cozzi@unibo.it); Homepage: [www.unibo.it](http://www.unibo.it)

## Table of contents:

|                                                           |         |
|-----------------------------------------------------------|---------|
| General Methods                                           | S2      |
| Preparation and description of <i>Cinchona</i> catalysts  | S2      |
| Preparation of aldehyde <b>11</b>                         | S3      |
| Screening test                                            | S3-S7   |
| Enantioselective $\alpha$ -alkylation of aldehydes        | S7      |
| Description of products <b>3a-l</b>                       | S7-S11  |
| Protection of hydroxyl group                              | S11     |
| Alkylation of benzodithiol                                | S12     |
| Reductive removal of benzothiol group                     | S12     |
| Oxidative removal of benzothiol group                     | S13     |
| References                                                | S13     |
| Copy of NMR spectra of products <b>IV-V</b>               | S15-S16 |
| Copy of NMR spectra of <b>11</b>                          | S17     |
| Copy of NMR spectra of products <b>3a-l</b>               | S18-S29 |
| Copy of NMR spectra of products <b>4a, 5a, 6a, 7a</b>     | S30-S33 |
| Copy of HPLC traces of products <b>3a-l</b> and <b>6a</b> | S34-S46 |

**General Methods.**  $^1\text{H}$  NMR spectra were recorded on Varian Gemini 200 and Varian Mercury 400 spectrometers. Chemical shifts are reported in ppm from TMS with the solvent resonance as the internal standard (deuteriochloroform:  $\delta = 7.27$  ppm). Data are reported as follows: chemical shift, multiplicity (s = singlet, d = duplet, t = triplet, q = quartet, bs = broad singlet, m = multiplet), coupling constants (Hz).  $^{13}\text{C}$  NMR spectra were recorded on Varian Gemini 200 and Varian Mercury 400 spectrometers. Chemical shifts are reported in ppm from TMS with the solvent as the internal standard (deuteriochloroform:  $\delta = 77.0$  ppm). Chromatographic purification was done with 240-400 mesh silica gel. Determination of enantiomeric ratio was performed on Agilent Technologies 1200 instrument equipped with a variable wave-length UV detector, using a Daicel Chiralpak columns (0.46 cm I.D. x 25 cm) and HPLC grade isopropanol and *n*-hexane were used as the eluting solvents. Optical rotations were determined in a 1 mL cell with a path length of 10 mm ( $\text{NaD}$  line), specific rotation was expressed as  $\text{deg cm}^3\text{g}^{-1}\text{dm}^{-1}$  and concentration as  $\text{gcm}^{-3}$ . Melting points were determined with Bibby Stuart Scientific Melting Point Apparatus SMP 3 and are not corrected. Materials: All reactions were carried out under inert gas and under anhydrous conditions. Anhydrous solvents were supplied by Aldrich in Sureseal® bottles and used avoiding purification.

Aldehydes **1a** and **1j** are commercially available. Aldehydes **1b-f** and **1i** were prepared according to reported methodologies.<sup>1</sup> The analytical data for **1b**, **1c**, **1f**, **1h**,<sup>1</sup> **1d**,<sup>2</sup> **1e**,<sup>3</sup> **1i**,<sup>4</sup> were consistent with the literature. **1g** was prepared according to literature.<sup>5</sup>

**Preparation of Cinchona catalysts:** catalyst **I-III** and **VI-VII**, were prepared according to the literature procedure.<sup>6</sup> **IV** and **V** were prepared using Hintermann procedure<sup>7</sup> followed by Cannon method.<sup>6</sup> The analytical data for **I**,<sup>8</sup> **II**,<sup>6</sup> **III**,<sup>9</sup> **VI**,<sup>10</sup> **VII**,<sup>11</sup> and were consistent with the literature.

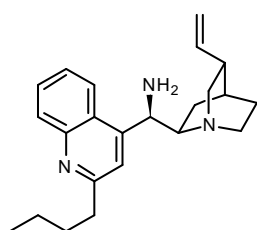

**IV** (45%); The desired product was isolated by flash column chromatography ( $\text{CH}_2\text{Cl}_2/\text{CH}_3\text{OH}/\text{NH}_4\text{OH} = 95/5/1$ ) as sticky solid;  $[\alpha]_{\text{D}}^{20} +79.6$  (c 1.3 in  $\text{CHCl}_3$ );  $^1\text{H}$  NMR (400 MHz,  $\text{CDCl}_3$ ,  $25^\circ\text{C}$ ):  $\delta = 0.96$  (t,  $J = 7.3$  Hz, 3H), 1.40-1.49 (m, 3H), 1.53-1.60 (m, 3H), 1.76-1.84 (m, 3H), 2.12 (bs, 3H), 2.27 (q,  $J = 7.9$  Hz, 1H), 2.90-3.08 (m, 7H), 4.74 (m, 1H), 5.05 (dt,  $J = 1.4$  Hz,  $J = 8.3$  Hz, 1H), 5.09 (m, 1H), 5.86 (ddd,  $J = 7.0$  Hz,  $J = 10.9$  Hz,  $J = 17.4$  Hz, 1H), 7.47 (bs, 1H), 7.51 (ddd,  $J = 1.4$  Hz,  $J = 7.0$  Hz,  $J = 8.2$  Hz, 1H), 7.67 (ddd,  $J = 1.3$  Hz,  $J = 6.9$  Hz,  $J = 8.2$  Hz, 1H), 8.07 (dd,  $J = 1.1$  Hz,  $J = 8.3$  Hz, 1H), 8.27 (bs, 1H);  $^{13}\text{C}$  NMR (100 MHz,  $\text{CDCl}_3$ ,  $25^\circ\text{C}$ ):  $\delta = 13.9$ , 22.7, 25.0, 26.6, 27.6, 32.2, 39.1, 39.6, 47.4, 49.5, 114.5, 119.7, 123.0, 125.4, 125.2, 128.1, 129.7, 140.5, 148.3, 148.7, 162.9; HMRS found  $\text{M}^+$ , 349.25151;  $\text{C}_{23}\text{H}_{31}\text{N}_3$  requires: 349.25180.

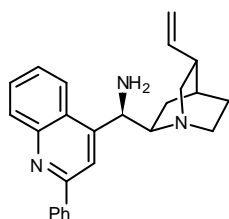

**V** (51%); The desired product was isolated by flash column chromatography ( $\text{CH}_2\text{Cl}_2/\text{CH}_3\text{OH}/\text{NH}_4\text{OH} = 95/5/1$ ) as white solid; mp 54 °C (from MeOH);  $[\alpha]_{\text{D}}^{20} +129.6$  ( $c$  1.0 in  $\text{CHCl}_3$ );  $^1\text{H}$  NMR (400 MHz,  $\text{CDCl}_3$ , 25°C):  $\delta$ = 0.94-1.02 (m, 1H), 1.16-1.21 (m, 2H), 1.53-1.60 (m, 2H), 2.23-2.30 (m, 3H), 2.94-3.11 (m, 5H), 4.83 (d,  $J$  = 8.1 Hz, 1H), 5.08 (dt,  $J$  = 1.6 Hz,  $J$  = 10.6 Hz, 1H), 5.10-5.12 (m, 1H), 5.88 (ddd,  $J$  = 6.8 Hz,  $J$  = 10.6 Hz,  $J$  = 17.2 Hz, 1H), 7.44-7.49 (m, 1H), 7.52-7.59 (m, 3H), 7.73 (ddd,  $J$  = 1.2 Hz,  $J$  = 6.9 Hz,  $J$  = 8.4 Hz, 1H), 8.11 (bs, 1H), 8.19-8.23 (m, 3H), 8.32 (bs, 1H);  $^{13}\text{C}$  NMR (100 MHz,  $\text{CDCl}_3$ , 25°C):  $\delta$ = 24.9, 25.3, 26.6, 27.6, 39.6, 47.4, 49.4, 50.4, 114.5, 117.5, 123.0, 126.0, 126.7, 127.5, 128.7, 129.1, 129.2, 130.6, 139.6, 140.5, 148.6, 149.5, 157.1; HMRS found  $\text{M}^+$ , 369.22019;  $\text{C}_{25}\text{H}_{27}\text{N}_3$  requires: 369.22050.

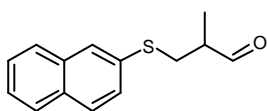

**Preparation of aldehyde 1l:** Following the procedure of Vedejes et al.<sup>12</sup> A mixture of 2-naphthalenethiol (3.6 mmol, 581 mg) and methacrolein (3.6 mmol, 300  $\mu\text{L}$ ) was refluxed with triethylamine (0.5 mL) for 3h. Solvent was removed under reduce pressure. Flash chromatography (cyclohexane/ethyl acetate, 95/5) of the residue give **1l** (571 mg, 69%) as sticky solid;  $^1\text{H}$  NMR (400 MHz,  $\text{CDCl}_3$ , 25°C):  $\delta$ = 1.29 (d,  $J$  = 7.3 Hz, 3H), 2.7 (m, 1H), 3.00 (dd,  $J$  = 6.8 Hz,  $J$  = 13.2 Hz, 1H), 3.00 (dd,  $J$  = 6.4 Hz,  $J$  = 13.2 Hz, 1H), 7.42-7.50 (m, 3H), 7.73-7.79 (m, 4H), 9.71 (d,  $J$  = 1.3 Hz, 1H);  $^{13}\text{C}$  NMR (100 MHz,  $\text{CDCl}_3$ , 25°C):  $\delta$ = 13.5, 34.5, 45.8, 125.9, 126.6, 127.1, 127.7, 128.0, 128.7, 132.0, 132.9, 133.7, 202.8; HMRS found  $\text{M}^+$ , 230.07610;  $\text{C}_{14}\text{H}_{14}\text{OS}$  requires: 230.07654.

## Screening test

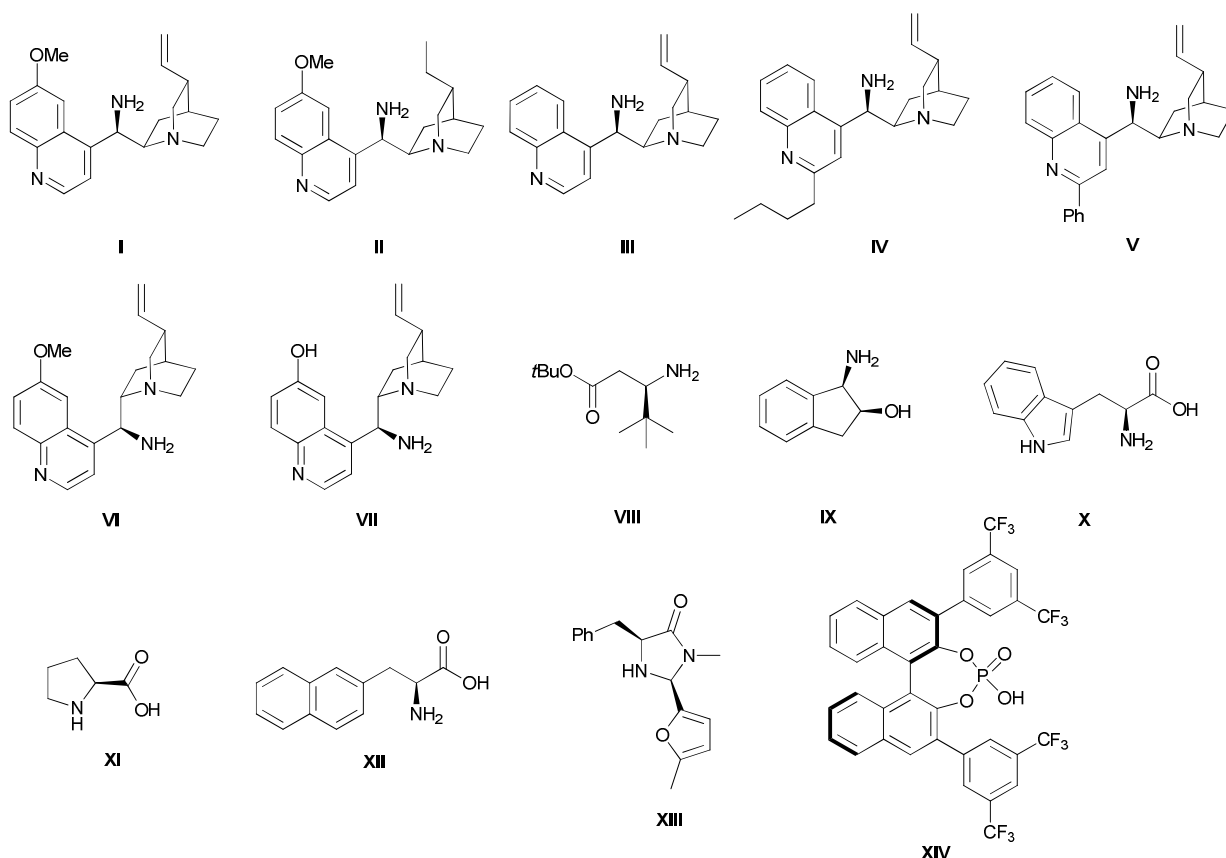

**Table S1.** Catalyst effect<sup>a</sup>

| Entry | Catalyst    | Acid (mol%)            | Solvent                                 | er        |
|-------|-------------|------------------------|-----------------------------------------|-----------|
| 1     | <b>I</b>    | (-)-CSA (40)           | CH <sub>3</sub> CN/H <sub>2</sub> O 1/1 | 92:8      |
| 2     | <b>II</b>   | (-)-CSA (40)           | CH <sub>3</sub> CN/H <sub>2</sub> O 1/1 | 89.5:10.5 |
| 3     | <b>III</b>  | (-)-CSA (40)           | CH <sub>3</sub> CN/H <sub>2</sub> O 1/1 | 90.5:9.5  |
| 4     | <b>IV</b>   | (-)-CSA (40)           | CH <sub>3</sub> CN/H <sub>2</sub> O 1/1 | 90:10     |
| 5     | <b>V</b>    | (-)-CSA (40)           | CH <sub>3</sub> CN/H <sub>2</sub> O 1/1 | 84.5:15.5 |
| 6     | <b>VI</b>   | (-)-CSA (40)           | CH <sub>3</sub> CN/H <sub>2</sub> O 1/1 | 11:89     |
| 7     | <b>VII</b>  | (+)-CSA (40)           | CH <sub>3</sub> CN/H <sub>2</sub> O 1/1 | 21.5:78.5 |
| 8     | <b>VIII</b> | (+)-CSA (20)           | CH <sub>3</sub> CN/H <sub>2</sub> O 1/1 | 50:50     |
| 9     | <b>IX</b>   | (+)-CSA (20)           | CH <sub>3</sub> CN/H <sub>2</sub> O 1/1 | 57:43     |
| 10    | <b>X</b>    | PNBA <sup>b</sup> (20) | CH <sub>3</sub> CN                      | 57:43     |
| 11    | <b>X</b>    | PNBA <sup>b</sup> (20) | CH <sub>3</sub> CN/H <sub>2</sub> O 1/1 | 47:53     |
| 12    | <b>X</b>    | -                      | CH <sub>3</sub> CN/H <sub>2</sub> O 1/1 | 44:56     |
| 13    | <b>XI</b>   | -                      | CH <sub>3</sub> CN/H <sub>2</sub> O 1/1 | 47:53     |
| 14    | <b>XI</b>   | -                      | CH <sub>3</sub> CN                      | 50:50     |
| 15    | <b>XII</b>  | (-)-CSA (20)           | CH <sub>3</sub> CN/H <sub>2</sub> O 1/1 | 48.5:51.5 |
| 16    | -           | (-)-CSA (20)           | CH <sub>3</sub> CN/H <sub>2</sub> O 1/1 | 50:50     |
| 17    | <b>XIII</b> | (-)-CSA (20)           | CH <sub>3</sub> CN/H <sub>2</sub> O 1/1 | 60:40     |

<sup>a</sup> The reactions were performed at 0°C with 1 equiv. of **2**, 3 equiv. of aldehyde **1a** in the presence of 20 mol% of catalysts **I-XIII**, with 2 equiv. of NaH<sub>2</sub>PO<sub>4</sub> and 20 mol% or 40% mol of acid as a co-catalyst in 500 μL of solvent at 0°C. The reactions were run until completion, as determined by TLC (16–24 h). <sup>b</sup> *p*-nitrobenzoic acid.

**Table S2.** Base effect<sup>a</sup>

| Entry | Catalyst  | Solvent                                 | Base                             | er        |
|-------|-----------|-----------------------------------------|----------------------------------|-----------|
| 1     | <b>I</b>  | CH <sub>2</sub> Cl <sub>2</sub>         | Imidazole                        | 50:50     |
| 2     | <b>VI</b> | CH <sub>3</sub> CN/H <sub>2</sub> O 1/1 | Na <sub>2</sub> HPO <sub>4</sub> | 59:41     |
| 3     | <b>VI</b> | CH <sub>3</sub> CN/H <sub>2</sub> O 1/1 | NaHCO <sub>3</sub>               | 55.5:44.5 |

<sup>a</sup> The reactions were performed at 0°C with 1 equiv. of **2**, 3 equiv. of aldehyde **1a** in the presence of 20 mol% of catalysts **I-VI**, with 2 equiv. of base and 40% mol of (-)-CSA as a co-catalyst in 500 µL of solvent. The reactions were run until completion, as determined by TLC (16–24 h).

**Table S3.** Solvent effect<sup>a</sup>

| Entry | Catalyst  | Solvent                                               | er        |
|-------|-----------|-------------------------------------------------------|-----------|
| 1     | <b>I</b>  | CH <sub>2</sub> Cl <sub>2</sub>                       | 31.5:68.5 |
| 2     | <b>VI</b> | Toluene/CH <sub>3</sub> CN 5/1                        | 46.5:53.5 |
| 3     | <b>VI</b> | Hexane/CH <sub>3</sub> CN 5/1                         | 50:50     |
| 4     | <b>I</b>  | CH <sub>3</sub> CN                                    | 83:17     |
| 5     | <b>I</b>  | H <sub>2</sub> O                                      | 72.5:27.5 |
| 6     | <b>I</b>  | CH <sub>3</sub> CN/H <sub>2</sub> O 1/1               | 92:8      |
| 7     | <b>I</b>  | CH <sub>3</sub> CN/H <sub>2</sub> O 9/1               | 92:8      |
| 8     | <b>I</b>  | CH <sub>3</sub> CN/H <sub>2</sub> O 1/9               | 89:11     |
| 9     | <b>I</b>  | [Bmim]OTf                                             | 28.5:71.5 |
| 10    | <b>I</b>  | C <sub>2</sub> H <sub>5</sub> CN/H <sub>2</sub> O 1/1 | 86.5:13.5 |
| 11    | <b>I</b>  | CH <sub>3</sub> CN/D <sub>2</sub> O 1/1               | 90:10     |
| 12    | <b>I</b>  | Dioxane/H <sub>2</sub> O 1/1                          | 81.5:18.5 |
| 13    | <b>I</b>  | THF/H <sub>2</sub> O 1/1                              | 78.5:21.5 |
| 14    | <b>I</b>  | DME/H <sub>2</sub> O 1/1                              | 73.5:26.5 |
| 15    | <b>I</b>  | TBME/H <sub>2</sub> O 1/1                             | 84:16     |
| 16    | <b>I</b>  | Toluene/H <sub>2</sub> O 1/1                          | 71:29     |
| 17    | <b>I</b>  | DMF/H <sub>2</sub> O 1/1                              | 89:11     |
| 18    | <b>I</b>  | DMSO                                                  | 54:46     |
| 19    | <b>I</b>  | DMSO/H <sub>2</sub> O 1/1                             | 82.5:17.5 |

<sup>a</sup> The reactions were performed at 0°C with 1 equiv. of **2**, 3 equiv. of aldehyde **1a** in the presence of 20 mol% of catalysts **I-VI**, with 2 equiv. of NaH<sub>2</sub>PO<sub>4</sub> and 40% mol of (-)-CSA as a co-catalyst in 500 µL of solvent. The reactions were run until completion, as determined by TLC (16–24 h).

**Table S4.** Temperature effect<sup>a</sup>

| Entry | Catalyst  | T (°C) | er        |
|-------|-----------|--------|-----------|
| 1     | <b>I</b>  | 0      | 92:8      |
| 2     | <b>I</b>  | 25     | 90.5:9.5  |
| 3     | <b>VI</b> | 0      | 11:89     |
| 4     | <b>VI</b> | -13    | 11.5:88.5 |

<sup>a</sup> The reactions were performed with 1 equiv. of **2**, 3 equiv. of aldehyde **1a** in the presence of 20 mol% of catalysts **I-VI**, with 2 equiv. of NaH<sub>2</sub>PO<sub>4</sub> and 40% mol of (-)-CSA as a co-catalyst in 500 μL of CH<sub>3</sub>CN/H<sub>2</sub>O 1/1. The reactions were run until completion, as determined by TLC (16–24 h).

**Table S5.** Acid effect<sup>a</sup>

| Entry | Catalyst (mol%) | Acid (mol%)                       | er        |
|-------|-----------------|-----------------------------------|-----------|
| 1     | <b>I</b> (20)   | Benzioc acid (40)                 | 63:37     |
| 2     | <b>I</b> (20)   | PNBA <sup>b</sup> (40)            | 68.5:31.5 |
| 3     | <b>VI</b> (20)  | <i>N</i> -Boc- <i>L</i> -His (40) | 14:86     |
| 4     | <b>VI</b> (20)  | <i>N</i> -Boc- <i>D</i> -Phe (40) | 12.5:87.5 |
| 5     | <b>VI</b> (20)  | <i>N</i> -Boc- <i>L</i> -Phe (40) | 13.5:86.5 |
| 6     | <b>VI</b> (20)  | <i>L</i> -Tartaric acid (40)      | 39:61     |
| 7     | <b>VI</b> (20)  | ( <i>R</i> )-Mandelic acid (40)   | 35:65     |
| 8     | <b>VI</b> (20)  | PTSA (40)                         | 14:86     |
| 9     | <b>VI</b> (20)  | (+)-Canforic acid                 | 12.5:87.5 |
| 10    | <b>VI</b> (20)  | <b>XIV</b> (40)                   | 50:50     |
| 11    | <b>VI</b> (20)  | TfOH (40)                         | 12:88     |
| 12    | <b>I</b> (20)   | (-)-CSA (40)                      | 91:9      |
| 13    | <b>I</b> (20)   | (+)-CSA (40)                      | 92:8      |
| 14    | <b>VI</b> (20)  | -                                 | 13:87     |
| 15    | <b>VI</b> (20)  | (-)-CSA (20)                      | 15.5:84.5 |
| 16    | <b>VI</b> (20)  | (-)-CSA (40)                      | 11:89     |
| 17    | <b>VI</b> (20)  | (-)-CSA (80)                      | 12.5:87.5 |
| 18    | <b>VI</b> (20)  | (+)-CSA (40)                      | 17.5:82.5 |
| 19    | <b>VII</b> (20) | (+)-CSA (40)                      | 21.5:78.5 |
| 20    | <b>VII</b> (20) | <b>XIV</b> (40)                   | 44:56     |
| 21    | <b>III</b> (20) | HCl (40) <sup>c</sup>             | 91:9      |
| 22    | <b>III</b> (20) | (-)-CSA (40)                      | 90.5:9.5  |

<sup>a</sup> The reactions were performed at 0°C with 1 equiv. of **2**, 3 equiv. of aldehyde **1a** in the presence of 20 mol% of catalysts **I-IV**, with 2 equiv. of NaH<sub>2</sub>PO<sub>4</sub> and different amount of acid as a co-catalyst in 500 μL of CH<sub>3</sub>CN/H<sub>2</sub>O 1/1. The reactions were run until completion, as determined by TLC (16–24 h). <sup>b</sup> *p*-nitrobenzoic acid. <sup>c</sup> Aqueous solution.

**Table S6.** Concentration effect<sup>a</sup>

| Entry | Catalyst (mol%) | Acid (mol%)  | Note                   | er       |
|-------|-----------------|--------------|------------------------|----------|
| 1     | <b>I</b> (5)    | (-)-CSA (10) | -                      | 87:13    |
| 2     | <b>I</b> (20)   | (-)-CSA (40) | 10 eq. di aldehyde     | 86:14    |
| 3     | <b>I</b> (20)   | (-)-CSA (40) | [Carbocation] = 0.1 M  | 92:8     |
| 4     | <b>I</b> (20)   | (-)-CSA (40) | [Carbocation] = 0.05 M | 90.5:9.5 |
| 5     | <b>I</b> (20)   | (-)-CSA (40) | [Carbocation] = 0.2 M  | 91:9     |

The reactions were performed at 0°C with 1 equiv. of **2**, 3 equiv. of aldehyde **1a** in the presence of catalysts **I**, with 2 equiv. of NaH<sub>2</sub>PO<sub>4</sub> and and (-)-CSA as a co-catalyst in 500 µL of CH<sub>3</sub>CN/H<sub>2</sub>O 1/1. The reactions were run until completion, as determined by TLC (16–24 h).

### Enantioselective $\alpha$ -alkylation of aldehydes

**General procedure:** A vial was charged with **I** (0.02 mmol, 6 mg), (-)-CSA (0.04 mmol, 9 mg), acetonitrile (0.25 mL) and water (0.25 mL). The mixture was cooled at 0°C, 1,3-benzodithiolium tetrafluoroborate **2** (0.1 mmol, 24 mg), NaH<sub>2</sub>PO<sub>4</sub> (0.2 mmol, 24 mg) and **1a** (0.3 mmol, 40 µL) were added. The mixture was stirred for 24 hours at the same temperature and a saturated solution of NaHCO<sub>3</sub> (1 mL) was added and the mixture was diluted with AcOEt (3mL). The organic layer was separated, and the aqueous layer was extracted with AcOEt (2 x 3 mL). The collected organic layers were washed with brine (5 mL), dried over Na<sub>2</sub>SO<sub>4</sub> and concentrated under reduce pressure. The residue was diluted in MeOH (1 mL) and NaBH<sub>4</sub> (0.4 mmol, 15 mg) was slowly added at 0 °C. After 30 minutes, silica was added and the solvent was evaporated in vacuo. The residue was purified by flash chromatography (cyclohexane/ethyl acetate = 9/1) to give **3a**.

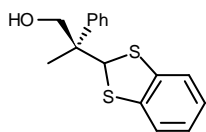

**3a** (26 mg, 90%); er = 92:8; The desired product was isolated by flash column chromatography (cyclohexane/ethyl acetate = 9/1) as colourless oil; The er was determined by HPLC analysis Daicel Chiralcel OD-H column: hexane/*i*-PrOH

90:10, flow rate 0.50 mL/min, 40°C,  $\lambda$  = 232, 254 nm:  $\tau_{major}$  = 23.2 min,  $\tau_{minor}$  = 25.7 min;  $[\alpha]_D^{20}$  - 7.1 (*c* 0.5 in CHCl<sub>3</sub>); <sup>1</sup>H NMR (400 MHz, CDCl<sub>3</sub>, 25°C):  $\delta$  = 1.51 (s, 3H), 3.78 (d, *J* = 11.1 Hz, 1H), 4.01 (d, *J* = 11.1 Hz, 1H), 5.64 (s, 1H), 6.93-6.95 (m, 2H), 7.06-7.08 (m, 1H), 7.14-7.16 (m, 1H), 7.29 (dt, *J* = 1.4 Hz, *J* = 7.3 Hz, 1H), 7.35-7.40 (m, 2H), 7.43-7.46 (m, 2H); <sup>13</sup>C NMR (100 MHz, CDCl<sub>3</sub>, 25°C):  $\delta$  = 16.9, 50.1, 60.6, 68.7, 121.4, 121.6, 125.1, 125.2, 127.2 (2C), 127.3, 128.6 (2C), 138.1, 141.9 (2C); HMRS found  $M^+$ , 288.06401; C<sub>16</sub>H<sub>16</sub>OS<sub>2</sub> requires: 288.06426.

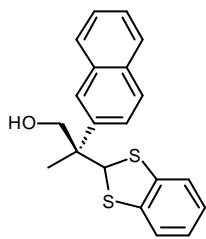

**3b** (28 mg, 83%); er = 93.5:6.5; The desired product was isolated by flash column chromatography (cyclohexane/ethyl acetate = 9/1) as colourless oil; The er was determined by HPLC analysis Daicel Chiralcel IA column: hexane/*i*-PrOH 90:10, flow rate 0.50 mL/min, 40°C,  $\lambda$  = 232, 254 nm:  $\tau_{major}$  = 30.1 min,  $\tau_{minor}$  = 27.9 min;  $[\alpha]_D^{20}$  -104.2 (*c* 1.0 in CHCl<sub>3</sub>); <sup>1</sup>H NMR (400 MHz, CDCl<sub>3</sub>, 25°C):  $\delta$  = 1.62 (s, 3H), 3.80 (d, *J* = 11.2 Hz, 1H), 4.11 (d, *J* = 11.2 Hz, 1H), 5.78 (s, 1H), 6.92-6.98 (m, 2H), 7.05-7.08 (m, 1H), 7.15-7.17 (m, 1H), 7.49-7.53 (m, 2H), 7.59 (dd, *J* = 2.1 Hz, *J* = 11.7 Hz, 1H), 7.82-7.89 (m, 4H); <sup>13</sup>C NMR (100 MHz, CDCl<sub>3</sub>, 25°C):  $\delta$  = 20.0, 50.3, 60.6, 68.7, 121.5, 121.6, 124.6, 125.1, 125.3, 126.2, 126.8, 127.4, 128.2, 128.3, 132.4, 133.1, 138.0, 138.1, 139.5; HMRS found M<sup>+</sup>, 338.07963; C<sub>20</sub>H<sub>18</sub>OS<sub>2</sub> requires: 338.07991.

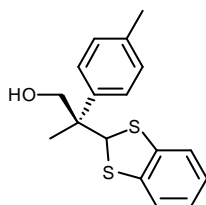

**3c** (27 mg, 89%); er = 90.5:9.5; The desired product was isolated by flash column chromatography (cyclohexane/ethyl acetate = 9/1) as colourless oil; The er was determined by HPLC analysis Daicel Chiralcel OD-H column: hexane/*i*-PrOH 90:10, flow rate 0.50 mL/min, 40°C,  $\lambda$  = 232, 254 nm:  $\tau_{major}$  = 15.7 min,  $\tau_{minor}$  = 17.8 min;  $[\alpha]_D^{20}$  -108.7 (*c* 1.4 in CHCl<sub>3</sub>); <sup>1</sup>H NMR (400 MHz, CDCl<sub>3</sub>, 25°C):  $\delta$  = 1.49 (s, 3H), 2.35 (s, 3H), 3.75 (d, *J* = 11.3 Hz, 1H), 3.99 (d, *J* = 11.3 Hz, 1H), 5.65 (s, 1H), 6.94-6.98 (m, 2H), 7.07-7.09 (m, 1H), 7.15-7.18 (m, 1H), 7.19-7.21 (m, 2H), 7.32-7.35 (m, 2H); <sup>13</sup>C NMR (100 MHz, CDCl<sub>3</sub>, 25°C):  $\delta$  = 16.8, 20.9, 49.8, 60.8, 68.7, 121.4, 121.6, 125.1, 12.0, 129.4, 137.0, 138.1, 138.8; HMRS found M<sup>+</sup>, 302.07969; C<sub>17</sub>H<sub>18</sub>OS<sub>2</sub> requires: 302.07991.

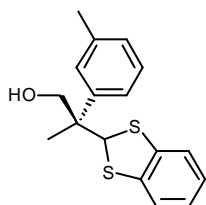

**3d** (26 mg, 85%); er = 92.5:7.5; The desired product was isolated by flash column chromatography (cyclohexane/ethyl acetate = 9/1) as colourless oil; The er was determined by HPLC analysis Daicel Chiralcel OD-H column: hexane/*i*-PrOH 90:10, flow rate 0.50 mL/min, 40°C,  $\lambda$  = 232, 254 nm:  $\tau_{major}$  = 18.3 min,  $\tau_{minor}$  = 15.7 min;  $[\alpha]_D^{20}$  -78.7 (*c* 0.4 in CHCl<sub>3</sub>); <sup>1</sup>H NMR (400 MHz, CDCl<sub>3</sub>, 25°C):  $\delta$  = 1.56 (s, 3H), 2.38 (s, 3H), 3.76 (dd, *J* = 6.8 Hz, *J* = 11.1 Hz, 1H), 3.99 (dd, *J* = 5.9 Hz, *J* = 11.1 Hz, 1H), 5.65 (s, 1H), 6.93-6.99 (m, 2H), 7.06-7.11 (m, 2H), 7.14-7.16 (m, 1H), 7.22-7.29 (m, 3H); <sup>13</sup>C NMR (25 MHz, CDCl<sub>3</sub>, 25°C):  $\delta$  = 16.9, 21.7, 50.0, 60.7, 68.8, 121.5, 121.6, 124.2, 125.1, 125.2, 127.9, 128.1, 128.5, 138.2, 141.8, 151.0; HMRS found M<sup>+</sup>, 302.07968; C<sub>17</sub>H<sub>18</sub>OS<sub>2</sub> requires: 302.07991.



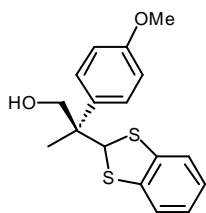

**3e** (28 mg, 88%); er = 85.5:14.5; The desired product was isolated by flash column chromatography (cyclohexane/ethyl acetate = 9/1) as colourless oil; The er was determined by HPLC analysis Daicel Chiralcel OD-H column: hexane/*i*-PrOH 90:10, flow rate 0.50 mL/min, 40°C,  $\lambda$  = 232, 254 nm:  $\tau_{major}$  = 27.2 min,  $\tau_{minor}$  = 29.5 min;  $[\alpha]_D^{20}$  -44.8 (*c* 2.5 in CHCl<sub>3</sub>); <sup>1</sup>H NMR (400 MHz, CDCl<sub>3</sub>, 25°C):  $\delta$  = 1.48 (s, 3H), 3.75 (d, *J* = 11.0 Hz, 1H), 3.81 (s, 3H), 3.97 (d, *J* = 11.0 Hz, 1H), 5.59 (s, 1H), 6.87-6.92 (m, 2H), 6.94-6.98 (m, 2H), 7.05-7.09 (m, 1H), 7.13-7.19 (m, 1H), 7.34-7.38 (m, 2H); <sup>13</sup>C NMR (100 MHz, CDCl<sub>3</sub>, 25°C):  $\delta$  = 17.0, 49.4, 55.2, 61.0, 68.7, 113.9 (2C), 121.4, 121.6, 125.1, 125.2, 128.3 (2C), 133.6, 138.0, 138.1, 158.6; HMRS found  $M^+$ , 318.07459; C<sub>17</sub>H<sub>18</sub>O<sub>2</sub>S<sub>2</sub> requires: 318.07482.

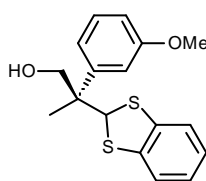

**3f** (28 mg, 88%); er = 91.5:8.5; The desired product was isolated by flash column chromatography (cyclohexane/ethyl acetate = 9/1) sticky solid; The er was determined by HPLC analysis Daicel Chiralcel OD-H column: hexane/*i*-PrOH 80:20, flow rate 0.50 mL/min, 40°C,  $\lambda$  = 232, 254 nm:  $\tau_{major}$  = 23.1 min,  $\tau_{minor}$  = 18.4 min;  $[\alpha]_D^{20}$  -47.9 (*c* 3.7 in CHCl<sub>3</sub>); <sup>1</sup>H NMR (400 MHz, CDCl<sub>3</sub>, 25°C):  $\delta$  = 1.46 (s, 3H), 3.72 (d, *J* = 10.6 Hz, 1H), 3.80 (s, 3H), 3.95 (d, *J* = 10.6 Hz, 1H), 5.60 (s, 1H), 6.80 (ddd, *J* = 0.8 Hz, *J* = 2.5 Hz, *J* = 8.4 Hz, 1H), 6.90-6.97 (m, 2H), 6.98-7.01 (m, 2H), 7.04-7.07 (m, 1H), 7.12-7.14 (m, 1H), 7.29 (t, *J* = 8.0 Hz, 1H), 6.87-6.92 (m, 2H), 6.94-6.98 (m, 2H), 7.05-7.09 (m, 1H), 7.13-7.19 (m, 1H); <sup>13</sup>C NMR (100 MHz, CDCl<sub>3</sub>, 25°C):  $\delta$  = 16.8, 50.2, 55.2, 60.5, 68.7, 111.8, 114.1, 119.4, 121.4, 121.6, 125.1, 125.2, 129.5, 138.1, 138.2, 143.6, 159.7; HMRS found  $M^+$ , 318.07455; C<sub>17</sub>H<sub>18</sub>O<sub>2</sub>S<sub>2</sub> requires: 318.07482.

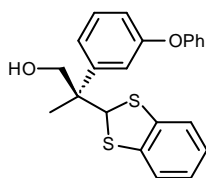

**3g** (20 mg, 52%); er = 90:10; desired product was isolated by flash column chromatography (cyclohexane/ethyl acetate = 9/1) as colourless oil; The er was determined by HPLC analysis Daicel Chiralcel OF column: hexane/*i*-PrOH 90:10, flow rate 0.50 mL/min, 40°C,  $\lambda$  = 232, 254 nm:  $\tau_{major}$  = 17.7 min,  $\tau_{minor}$  = 10.3 min;  $[\alpha]_D^{20}$  -49.3 (*c* 0.6 in CHCl<sub>3</sub>); <sup>1</sup>H NMR (400 MHz, CDCl<sub>3</sub>, 25°C):  $\delta$  = 1.46 (s, 3H), 1.59 (bs, 1H), 3.78 (d, *J* = 11.4 Hz, 1H), 3.99 (d, *J* = 11.4 Hz, 1H), 5.54 (s, 1H), 6.88 (ddd, *J* = 1.0 Hz, *J* = 2.4 Hz, *J* = 8.9 Hz, 1H), 6.95-6.97 (m, 2H), 6.99-7.02 (m, 2H), 7.07-7.10 (m, 1H), 7.12-7.17 (m, 3H), 7.20 (ddd, *J* = 1.0 Hz, *J* = 1.8 Hz, *J* = 7.9 Hz, 1H), 7.28-7.38 (m, 3H); <sup>13</sup>C NMR (100 MHz, CDCl<sub>3</sub>, 25°C):  $\delta$  = 17.1, 50.1, 50.0, 60.4, 68.4, 117.4, 118.4, 118.7 (2C), 121.4 (2C), 121.6, 122.1, 123.3, 125.2, 125.3, 129.6, 129.8 (2C), 138.0, 144.0, 157.1, 157.2; HMRS found  $M^+$ , 380.09020; C<sub>22</sub>H<sub>20</sub>O<sub>2</sub>S<sub>2</sub> requires: 380.09047.

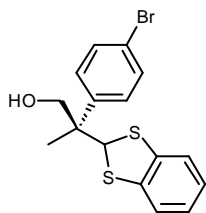

**3h** (31 mg, 84%); er = 86.5:13.5; The desired product was isolated by flash column chromatography (cyclohexane/ethyl acetate = 9/1) as colourless oil; The er was determined by HPLC analysis Daicel Chiralcel OD-H column: hexane/*i*-PrOH 90:10, flow rate 0.50 mL/min, 40°C,  $\lambda$  = 232, 254 nm:  $\tau_{major}$  = 21.1 min,  $\tau_{minor}$  = 19.7 min;  $[\alpha]_D^{20}$  -60.2 (*c* 0.3 in CHCl<sub>3</sub>); <sup>1</sup>H NMR (400 MHz, CDCl<sub>3</sub>, 25°C):  $\delta$  = 1.46 (s, 3H), 3.78 (d, *J* = 10.8 Hz, 1H), 4.00 (d, *J* = 10.8 Hz, 1H), 5.53 (s, 1H), 6.94-6.99 (m, 2H), 7.06-7.08 (m, 1H), 7.11-7.14 (m, 1H), 7.32-7.35 (m, 2H), 7.44-7.47 (m, 2H); <sup>13</sup>C NMR (100 MHz, CDCl<sub>3</sub>, 25°C):  $\delta$  = 17.1, 49.8, 60.3, 68.2, 125.5, 121.6, 125.2, 125.3, 129.1 (2C), 131.4 (2C), 137.8, 137.9 (2C), 140.8; HMRS: no ionization was observed.

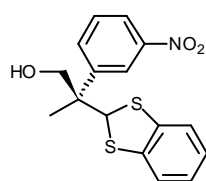

**3i** (25 mg, 75%); er = 84:16; The desired product was isolated by flash column chromatography (cyclohexane/ethyl acetate = 7/3) as sticky solid; The er was determined by HPLC analysis Daicel Chiralcel IA column: hexane/*i*-PrOH 90:10, flow rate 0.50 mL/min, 40°C,  $\lambda$  = 232, 254 nm:  $\tau_{major}$  = 27.3 min,  $\tau_{minor}$  = 29.1 min;  $[\alpha]_D^{20}$  -46.4 (*c* 0.6 in CHCl<sub>3</sub>); <sup>1</sup>H NMR (400 MHz, CDCl<sub>3</sub>, 25°C):  $\delta$  = 1.55 (s, 3H), 3.96 (d, *J* = 10.6 Hz, 1H), 4.09 (d, *J* = 10.6 Hz, 1H), 5.40 (s, 1H), 6.87-6.91 (m, 2H), 7.00-7.06 (m, 2H), 7.42 (t, *J* = 8.2 Hz, 1H), 7.83 (ddd, *J* = 1.0 Hz, *J* = 1.9 Hz, *J* = 8.0 Hz, 1H), 8.03 (ddd, *J* = 1.0 Hz, *J* = 1.9 Hz, *J* = 8.0 Hz, 1H), 8.4 (t, *J* = 2.1 Hz, 1H); <sup>13</sup>C NMR (100 MHz, CDCl<sub>3</sub>, 25°C):  $\delta$  = 18.0, 49.7, 59.9, 67.3, 121.4, 121.5, 122.1, 122.8, 125.3, 128.5, 133.8, 137.5 (2C), 143.4, 147.8; HMRS found M<sup>+</sup>, 333.04908; C<sub>16</sub>H<sub>15</sub>NO<sub>3</sub>S<sub>2</sub> requires: 333.04933.

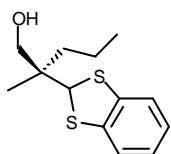

**3j** (19 mg, 76%); er = 72:28; The desired product was isolated by flash column chromatography (cyclohexane/ethyl acetate = 95/5) as colourless oil; The er was determined by HPLC analysis Daicel Chiralcel IC column: hexane/*i*-PrOH 98:2, flow rate 0.50 mL/min, 40°C,  $\lambda$  = 232, 254 nm:  $\tau_{major}$  = 27.2 min.,  $\tau_{minor}$  = 25.5 min;  $[\alpha]_D^{20}$  -28.0 (*c* 0.3 in CHCl<sub>3</sub>); <sup>1</sup>H NMR (400 MHz, CDCl<sub>3</sub>, 25°C):  $\delta$  = 0.93 (t, *J* = 7.3 Hz, 3H), 0.94 (s, 3H), 1.27-1.39 (2H), 1.44-1.49 (m, 2H), 1.61 (bs, 1H), 3.58 (d, *J* = 11.3 Hz, 1H), 3.66 (d, *J* = 11.3 Hz, 1H), 5.26 (s, 1H), 6.97-7.01 (m, 2H), 7.16-7.21 (m, 1H); <sup>13</sup>C NMR (100 MHz, CDCl<sub>3</sub>, 25°C):  $\delta$  = 14.9, 17.0, 17.8, 36.8, 41.1, 62.9, 66.4, 121.6 (2C), 125.2, 125.3, 138.1, 138.2; HMRS found M<sup>+</sup>, 254.07971; C<sub>13</sub>H<sub>18</sub>OS<sub>2</sub> requires: 254.07991.

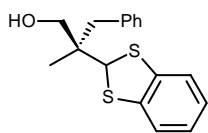

**3k** (24 mg, 78%); er = 73:27; The desired product was isolated by flash column chromatography (cyclohexane/ethyl acetate = 95/5) as colourless oil; The er was determined by HPLC analysis Daicel Chiralcel OJ column: hexane/*i*-PrOH 80:20, flow rate 1.00 mL/min, 40°C,  $\lambda$  = 232, 254 nm:  $\tau_{major}$  = 10.6 min,  $\tau_{minor}$  = 11.9 min;  $[\alpha]_D^{20}$  -24.3 (*c* 0.5 in CHCl<sub>3</sub>); <sup>1</sup>H NMR (400 MHz, CDCl<sub>3</sub>, 25°C):  $\delta$  = 0.91 (s, 3H), 2.80 (d, *J* = 13.3 Hz, 1H), 2.85 (d, *J* = 13.3 Hz, 1H), 3.51 (d, *J* = 11.1 Hz, 1H), 3.59 (d, *J* = 11.1 Hz, 1H), 5.20 (s, 1H), 7.00-7.02 (m, 2H), 7.20-7.25 (m, 4H), 7.27-7.32 (m, 3H); <sup>13</sup>C NMR (100 MHz, CDCl<sub>3</sub>, 25°C):  $\delta$  = 17.4, 39.7, 45.8, 60.9, 65.4, 121.7, 125.2, 125.3 (2C), 126.5, 128.2 (2C), 130.6 (2C), 137.3, 138.2, 138.2; HMRS found  $M^+$ , 302.07913; C<sub>17</sub>H<sub>18</sub>OS<sub>2</sub> requires: 302.07991.

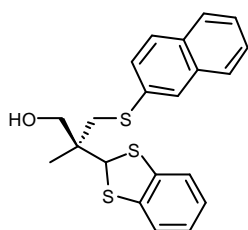

**3l** (30 mg, 79%); er = 66:34; The desired product was isolated by flash column chromatography (cyclohexane/ethyl acetate = 9/1) as sticky solid; The er was determined by HPLC analysis Daicel Chiralcel OJ column: hexane/*i*-PrOH 50:50, flow rate 0.5 mL/min, 40°C,  $\lambda$  = 232, 254 nm:  $\tau_{major}$  = 29.5 min,  $\tau_{minor}$  = 37.8 min;  $[\alpha]_D^{20}$  -31.3 (*c* 0.5 in CHCl<sub>3</sub>); <sup>1</sup>H NMR (400 MHz, CDCl<sub>3</sub>, 25°C):  $\delta$  = 1.06 (s, 3H), 3.28 (d, *J* = 12.6 Hz, 1H), 3.34 (d, *J* = 12.6 Hz, 1H), 3.75 (s, 2H), 5.36 (s, 1H), 7.00-7.04 (m, 2H), 7.19-7.21 (m, 2H), 7.43-7.51 (m, 3H), 7.74-7.81 (m, 4H); <sup>13</sup>C NMR (100 MHz, CDCl<sub>3</sub>, 25°C):  $\delta$  = 17.2, 39.9, 46.8, 59.5, 65.8, 121.6, 121.7, 125.4 (2C), 125.9, 126.7, 127.1, 127.4, 127.5, 127.7, 128.6, 131.9, 133.7, 134.1, 138.1 (2C); HMRS found  $M^+$ , 384.06796; C<sub>21</sub>H<sub>20</sub>OS<sub>3</sub> requires: 384.06763.

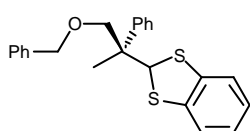

**Protection of hydroxyl group:** To a suspension of NaH (1.3 mmol, 52 mg of a 60% suspension in mineral oil) in anhydrous THF (3 mL) a solution of **3a** (0.65 mmol, 187 mg) in THF (1 mL) was slowly added at 0°C. After 30 minutes benzylbromide (1.0 mmol, 116  $\mu$ L) was added and the mixture was stirred at room temperature for 18 hours. Water (5 mL) was slowly added and the mixture was diluted with Et<sub>2</sub>O (3mL). The organic layer was separated, and the aqueous layer was extracted with Et<sub>2</sub>O (2 x 5 mL). The collected organic layers were washed with brine (5 mL), dried over Na<sub>2</sub>SO<sub>4</sub> and concentrated under reduce pressure.

Flash chromatography (cyclohexane/ethyl acetate, 9/1) of the residue give **4a** (231 mg, 94%) as colourless oil.  $[\alpha]_D^{20}$  -42.6 (*c* 0.5 in CHCl<sub>3</sub>); <sup>1</sup>H NMR (400 MHz, CDCl<sub>3</sub>, 25°C):  $\delta$  = 1.45 (s, 3H), 3.61 (d, *J* = 9.2 Hz, 1H), 3.78 (d, *J* = 9.2 Hz, 1H), 4.48 (s, 2H), 5.70 (s, 1H), 6.88-6.94 (m, 2H), 7.02-7.05 (m, 1H), 7.07-7.10 (m, 1H), 7.22-7.35 (m, 8H), 7.47-7.51 (m, 2H); <sup>13</sup>C NMR (100 MHz, CDCl<sub>3</sub>, 25°C):  $\delta$  = 17.5, 48.9, 60.8, 73.5, 75.8, 121.4, 121.5, 125.0, 125.1, 127.1 (2C), 127.5 (2C),

127.7 (2C), 128.1 (2C), 128.5 (2C), 138.2, 138.5, 138.6, 142.9; HMRS found  $M^+$ , 378.11092;  $C_{23}H_{22}OS_2$  requires: 378.11121.

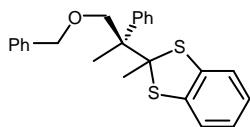

**Alkylation of benzodithiol:** A solution of *n*BuLi (0.033 mmol, 206  $\mu$ L, 1.6 M in hexanes) was added dropwise to a solution of **4a** (0.3 mmol, 112 mg) in anhydrous in THF (2 mL) at 0°C. The mixture turns to orange colour. After 5

minutes methyl iodide (1.5 mmol, 76  $\mu$ L) was added and the solution became colourless. The solution was stirred for 5 minutes and then water (1 mL) was added. The organic layer was separated, and the aqueous layer was extracted with Et<sub>2</sub>O (2 x 5 mL). The collected organic layers were washed with brine (5 mL), dried over Na<sub>2</sub>SO<sub>4</sub> and concentrated under reduce pressure. Flash chromatography (cyclohexane/ethyl acetate = 9/1) of the residue give **5a** (107 mg, 91%) as colourless oil.  $[\alpha]_D^{20}$  -15.7 (*c* 0.5 in CHCl<sub>3</sub>); <sup>1</sup>H NMR (400 MHz, CDCl<sub>3</sub>, 25°C):  $\delta$ = 1.78 (s, 3H), 1.82 (s, 3H), 4.06 (d, *J* = 9.4 Hz, 1H), 4.26 (d, *J* = 9.4 Hz, 1H), 4.55 (d, *J* = 12.4 Hz, 1H), 4.61 (d, *J* = 12.4 Hz, 1H), 6.95-6.99 (m, 2H), 7.10-7.13 (m, 2H), 7.28-7.35 (m, 8H), 7.49-7.52 (m, 2H); <sup>13</sup>C NMR (100 MHz, CDCl<sub>3</sub>, 25°C):  $\delta$ = 22.6, 29.4, 49.4, 73.4, 76.9, 122.1, 122.2, 125.0, 125.1, 127.1, 127.4, 127.5, 127.6 (3C), 128.1 (2C), 128.2 (2C), 136.8, 137.9, 138.1, 141.1; HMRS found  $M^+$ , 392.12656;  $C_{24}H_{24}OS_2$  requires: 392.12686.

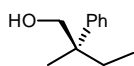

**Reductive removal of benzodithiol group:** To a solution of **5a** (0.08 mmol, 31 mg) in methanol (1 mL), Ni-Raney (0.450 g, slurry in water) was added and the reaction was kept under H<sub>2</sub> atmosphere (1 atm). After 18h the reaction mixture was filtered through a Celite pad and the organic solvent was removed under reduce pressure. The residue was diluted with AcOEt, the organic layer was separated, and the aqueous layer was extracted with AcOEt (2 x 5 mL).

The residual was dissolved in MeOH (5 mL), 10% Pd/C (10 mg) was added and the reaction was kerp under hydrogen atmosphere for 18h. The reaction mixture was filtered through a Celite pad and the organic solvent was removed under reduce pressure.

Flash chromatography (cyclohexane/ethylacetate, 8/2) of the residue give **6a** (11.3 mg, 86%) as colourless oil. All spectra data were consistent with the literature.<sup>13</sup>  $[\alpha]_D^{20}$  -2.9 (*c* 0.5 in CHCl<sub>3</sub>); lit.:  $[\alpha]_D^{20}$  -3.6 (*c* 0.8 in CHCl<sub>3</sub>, ee = 83%).<sup>14</sup>

Absolute configuration was confirmed by comparison of the chiral HPLC retention time (Daicel Chiralcel OF column: hexane/*i*-PrOH 90:10, flow rate 0.50 mL/min, 40°C,  $\lambda$  = 214 nm:  $\tau_{major(R)}$  = 21.0 min,  $\tau_{minor(S)}$  = 26.4 min;) in the literature.<sup>13</sup>

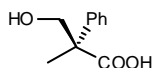

### Oxidative removal of benzodithiol group, synthesis of (2R)-(+)- $\alpha$ -methyltropic acid:

To a solution of **4a** (0.08 mmol, 30 mg) in acetonitrile (1 mL) at 0°C, 30% H<sub>2</sub>O<sub>2</sub> (320  $\mu$ L) was added. 40% HBr (0.16 mmol, 21  $\mu$ L) was slowly added and the reaction mixture was raised at room temperature. After 4h Na<sub>2</sub>S<sub>2</sub>O<sub>5</sub> (1.0 g), was slowly added at 0°C and the mixture was diluted with AcOEt (5 mL). Water (0.25 mL) and NaHCO<sub>3</sub> aq. were added until pH 8.0. The organic layer was separated, and the aqueous layer was extracted with AcOEt (2 x 5 mL). HCl (0.1M) was added to the aqueous phase until pH=2 and AcOEt was added. The organic layer was separated, and the aqueous layer was extracted with AcOEt (2 x 5 mL). The collected organic layers were washed with brine (5 mL), dried over Na<sub>2</sub>SO<sub>4</sub> and concentrated under reduce pressure to give a colourless oil.

The residual was dissolved in MeOH (5 mL), 10% Pd/C (10 mg) was added and the reaction was kept under hydrogen atmosphere for 18h. The reaction mixture was filtered through a Celite pad and the organic solvent was removed under reduce pressure.

Flash chromatography (cyclohexane/ethylacetate/acetic acid, 1/1/0.05) of the residue give **7a** (10.9 mg, 76%) as colourless oil. Spectroscopy data are in according with literature.<sup>15</sup> [ $\alpha$ ]<sub>D</sub><sup>20</sup> +20.5 (c 0.2 in CHCl<sub>3</sub>); lit.: [ $\alpha$ ]<sub>D</sub><sup>20</sup> +21.3 (c 0.7 in CHCl<sub>3</sub>).<sup>16</sup>

### References

- 1 S. Hoffmann, M. Nicoletti and B. List, *J. Am. Chem. Soc.*, 2006, **128**, 13074.
- 2 S. Mukherjee and B. List, *J. Am. Chem. Soc.*, 2007, **129**, 11336.
- 3 T. Baumann, H. Vogt, S. Bräse *Eur. J. Org. Chem.*, 2007, 266.
- 4 H. Ahlbrecht, W. Funk and M.Th. Reiner, *Tetrahedron*, 1976, **32**, 479.
- 5 P. Galletti, E. Emer, G. Gucciardo, A. Quintavalla, M. Pori and D. Giacomini, *Org. Biomol. Chem.*, 2010, **8**, 4117.
- 6 S. H. McCooey and S. J. Connon, *Angew. Chem. Int. Ed.*, 2005, **44**, 6367.
- 7 L. Hintermann, M. Schmitz and U. Englert, *Angew. Chem. Int. Ed.*, 2007, **46**, 5164.
- 8 H. Brunner and P. Schmidt *Eur. J. Org. Chem.*, 2011, 3449.
- 9 W. Chen, W. Du, Y.-Z. Duan, Y. Wu, S.-Y. Yang, and Y.-C. Chen, *Angew. Chem. Int. Ed.*, 2007, **46**, 7667.
- 10 C. G. Oliva, A. M. S. Silva, D. I. S. P. Resende, F. A. A. Paa and J. A. S. Cavaleiro, *Eur. J. Org. Chem.*, 2000, 2119.

- 11 H. Brunner, J. Bügler and B. Nuber, *Tetrahedron: Asymmetry* 1995, **6**, 1699.
- 12 E. Vedejs, R.A. Buchanan, P.C. Conrad, G.P. Meier, M.J. Mullins, J.G. Schaffhausen, C.E. Schwartz, *J. Am. Chem. Soc.*, 1987, **111**, 8421.
- 13 R. P. Sonawane, V. Jheengut, C. Rabalakos, R. L.-Gauthier, H. K. Scott, V. K. Aggarwal, *Angew. Chem. Int. Ed.*, 2011, **50**, 3760.
- 14 Q. Zhu and Y. Lu, *Chem Comm.* 2010, **46**, 2235.
- 15 D. Imao, A. Itoi, A. Yamazaki, M. Shirakura, R. Ohtoshi, K. Ogata, Y. Ohmori, T. Ohta and Y. Ito, *J. Org. Chem.*, 2007, **72**, 1652.
- 16 D. S. Im, C. S. Cheong and S. H. Lee, *J. Mol. Catal. B: Enzym.*, 2002, **26**, 131.

Copy of NMR spectra

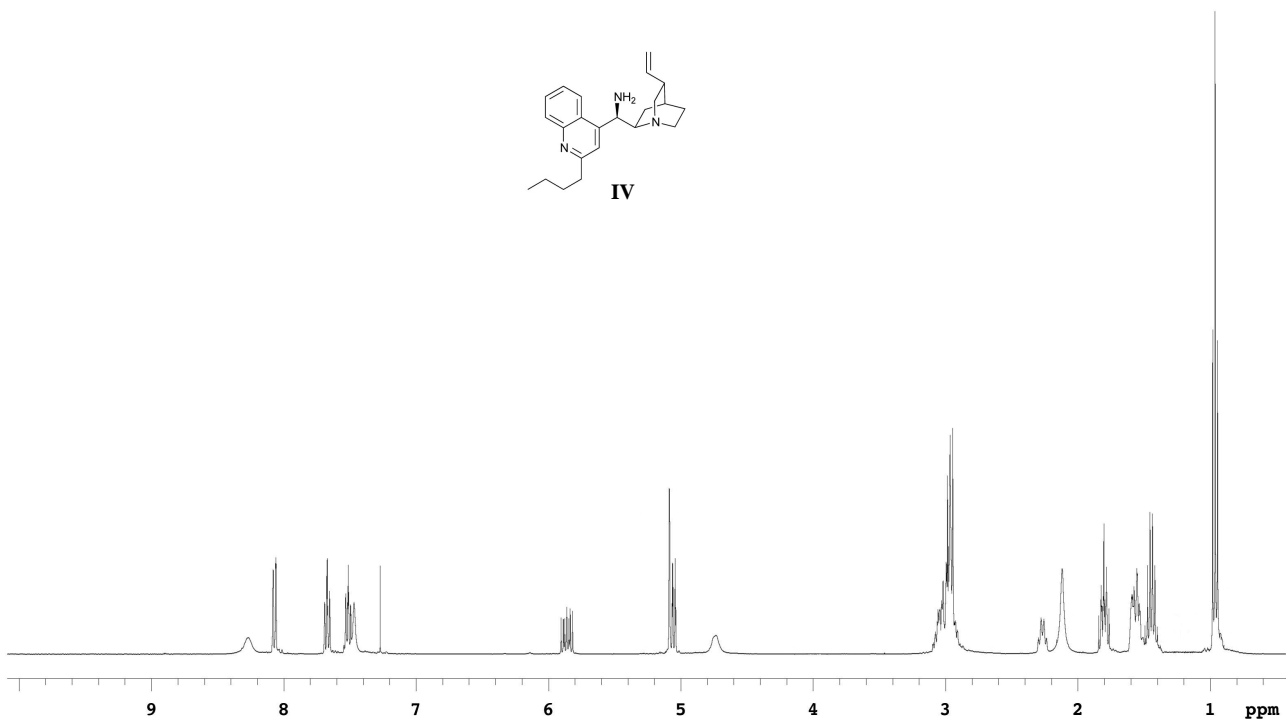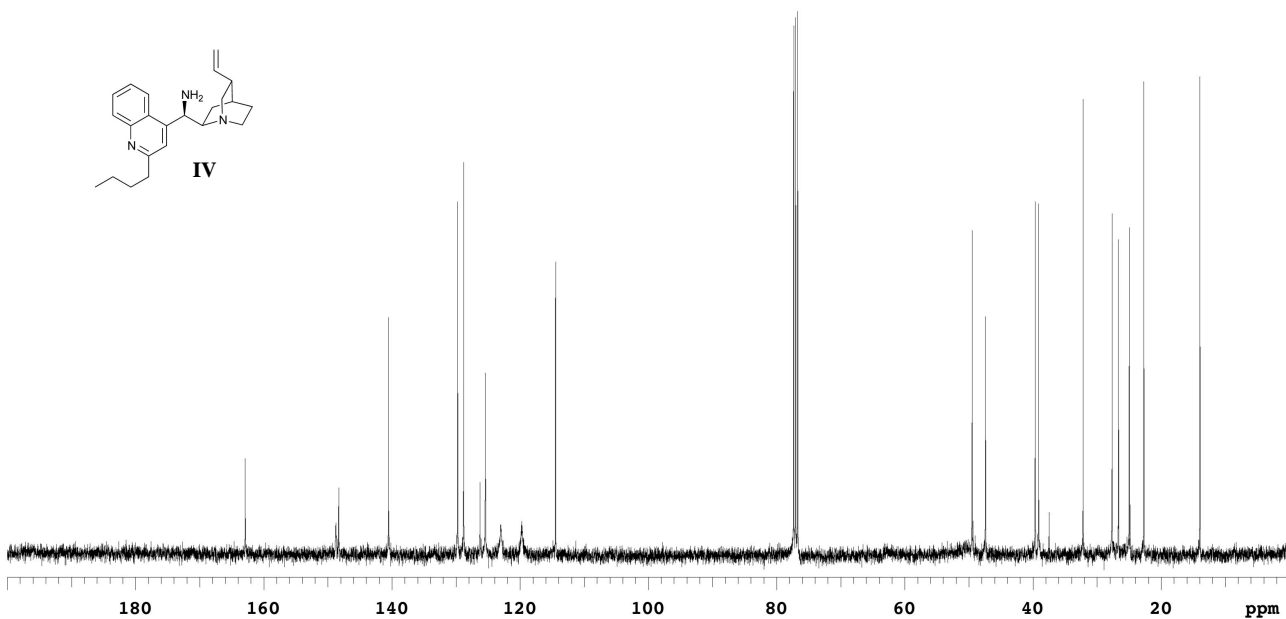

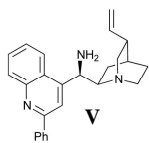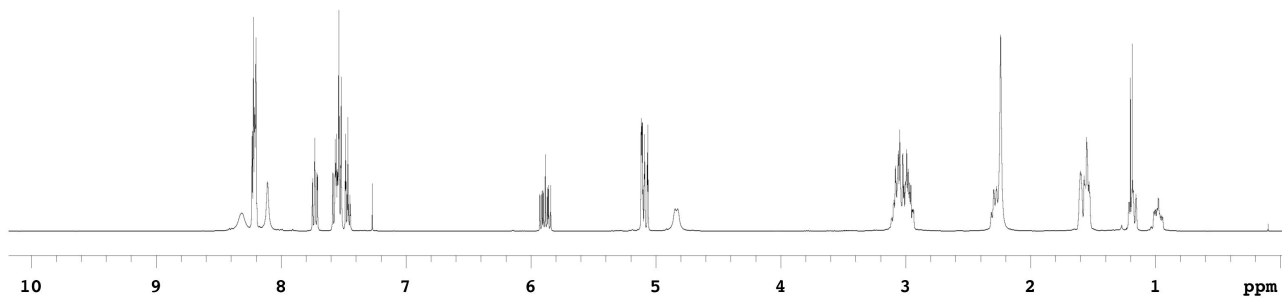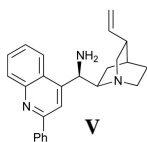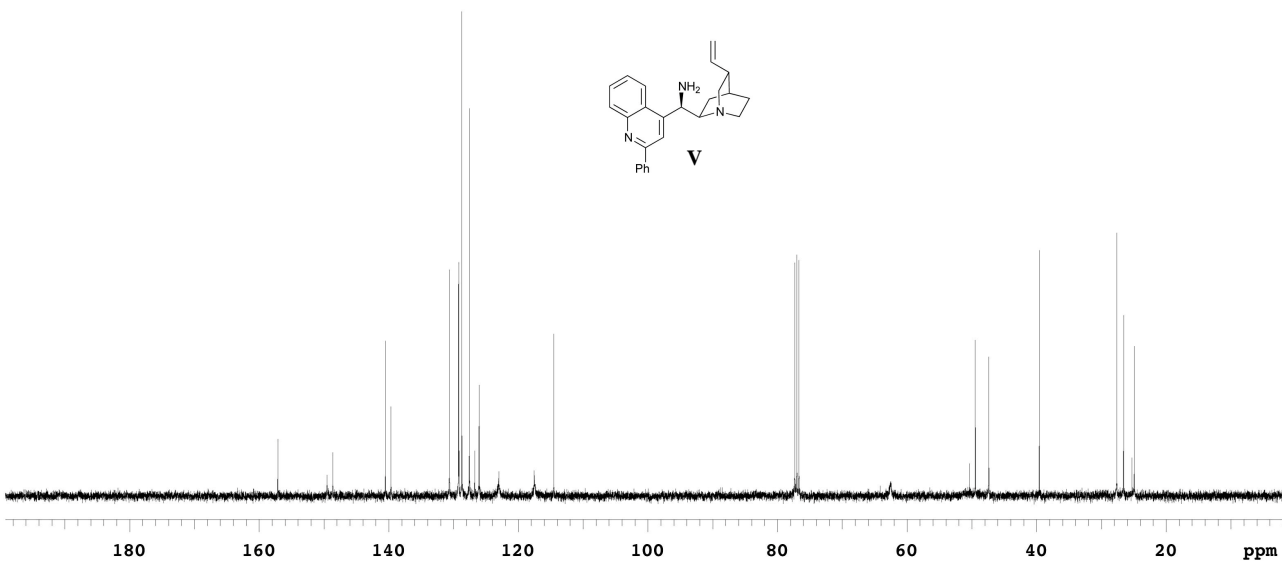



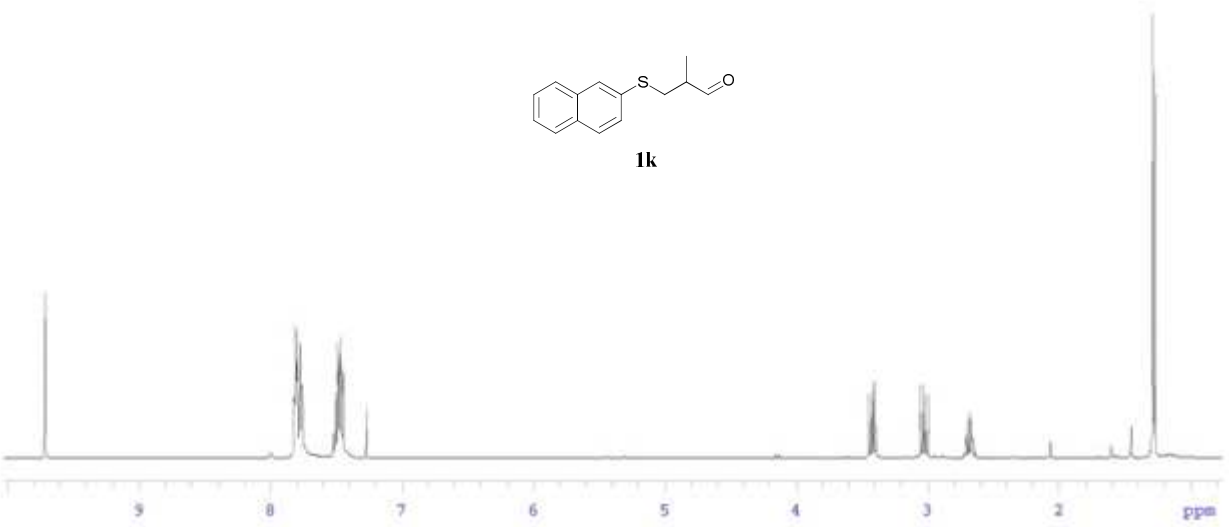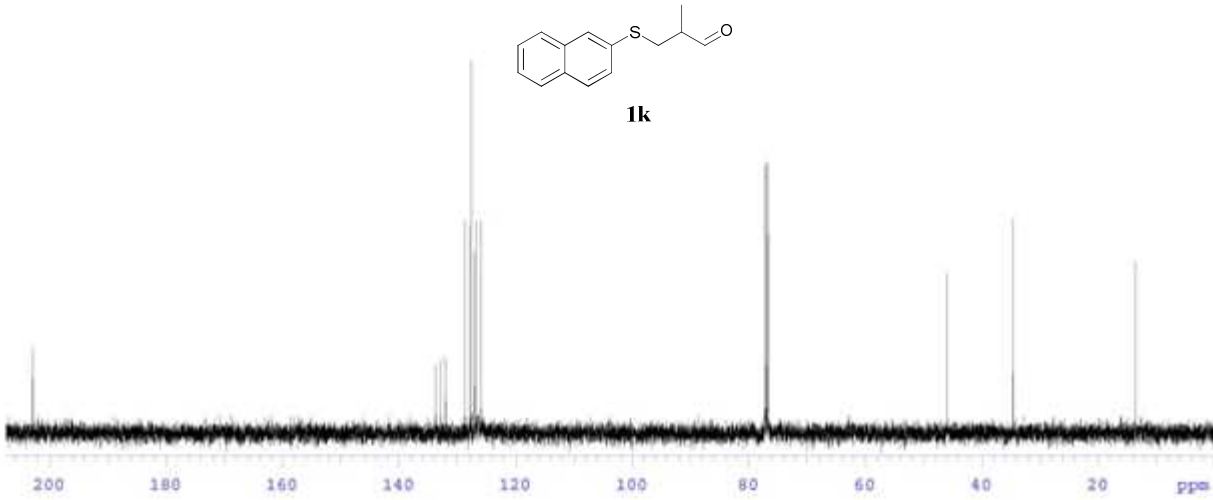

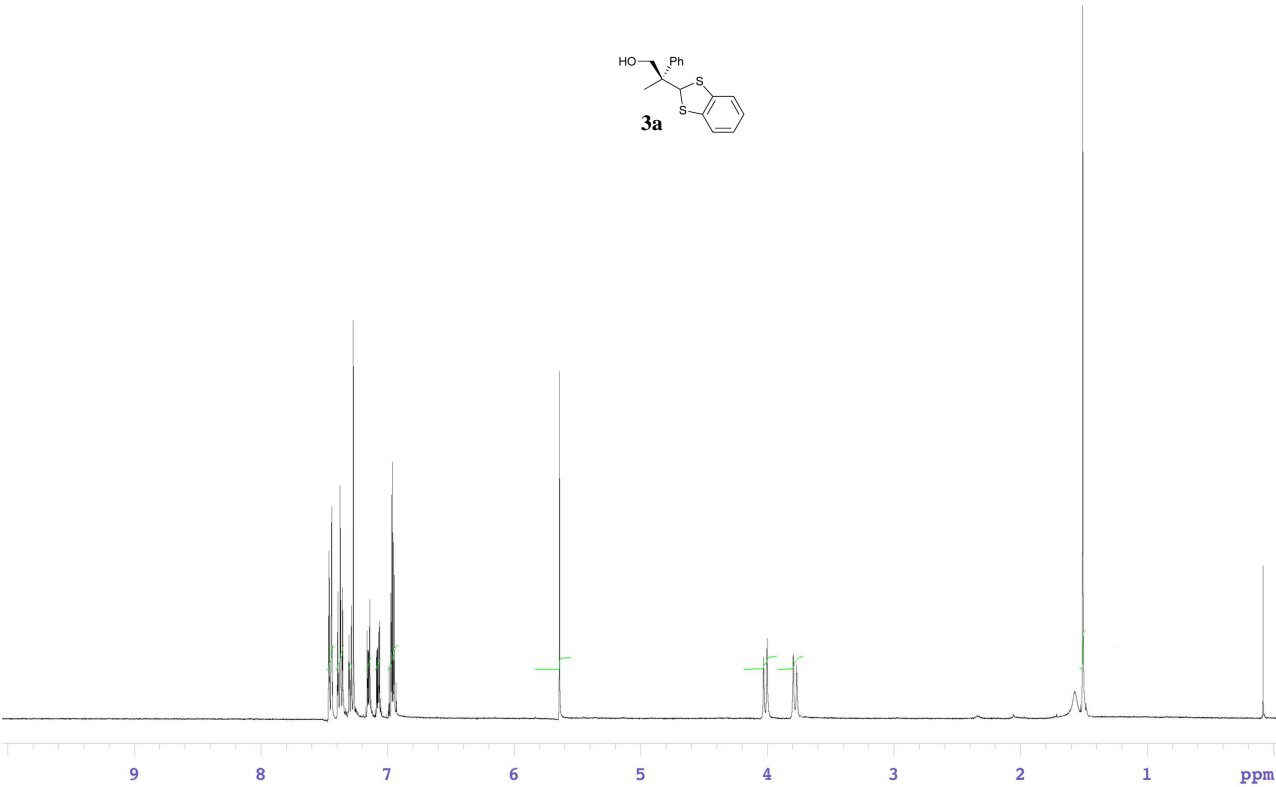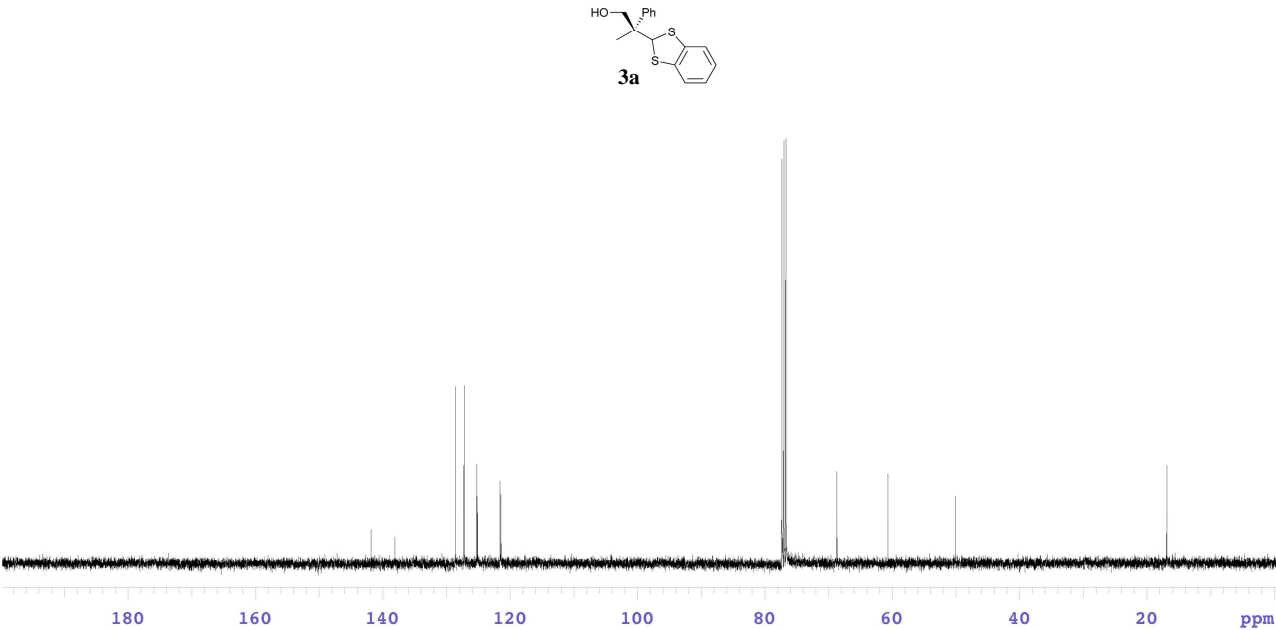

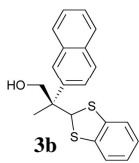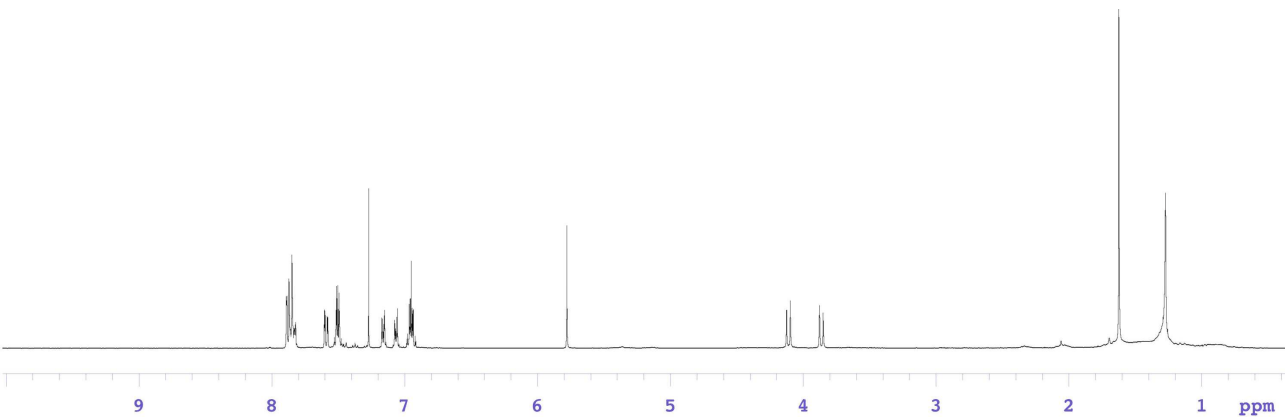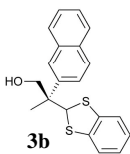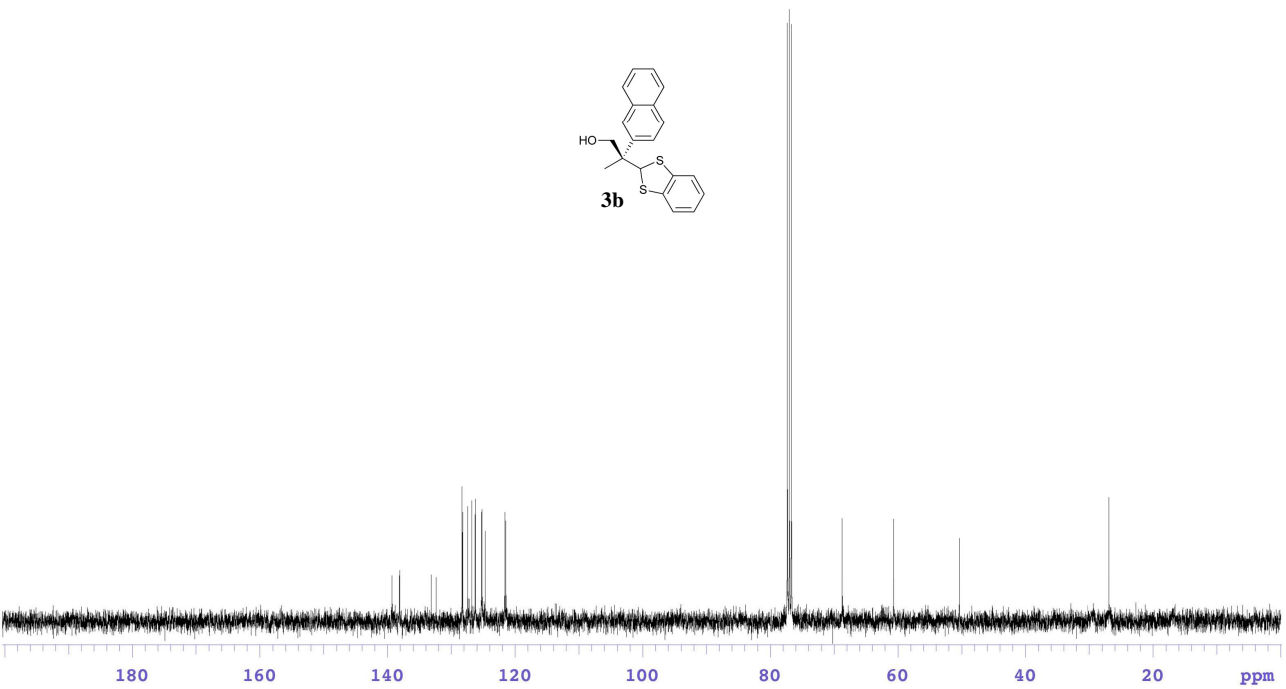

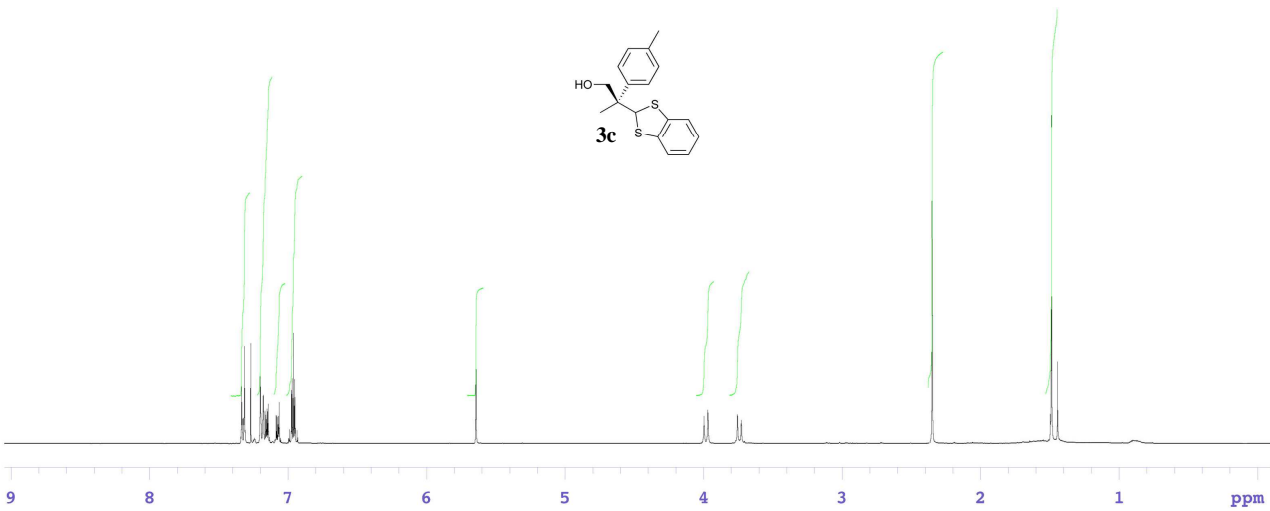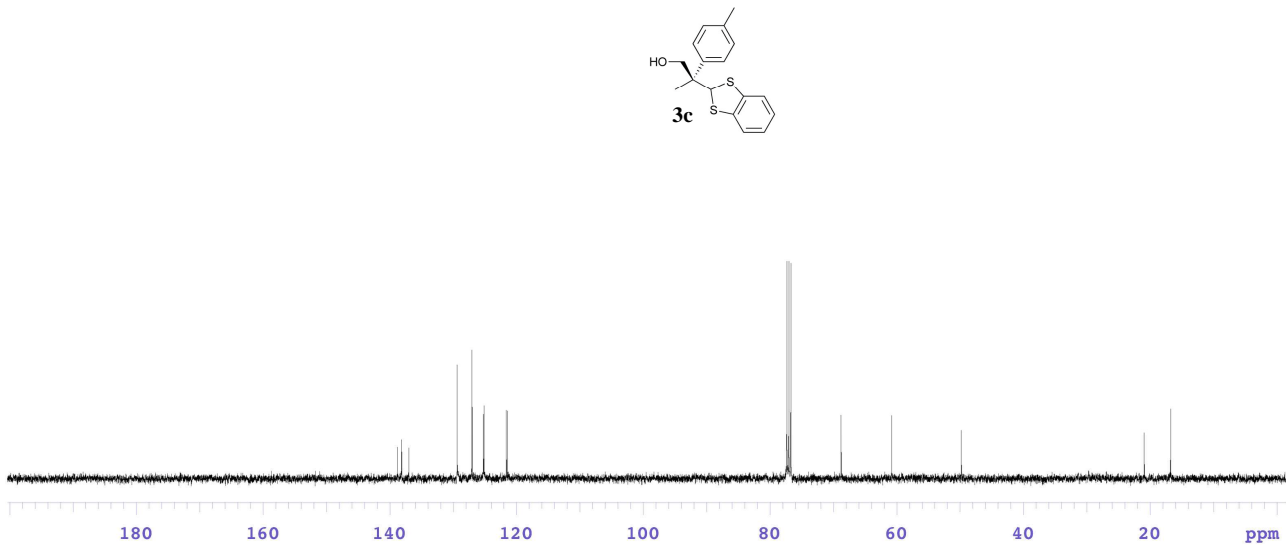

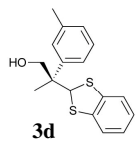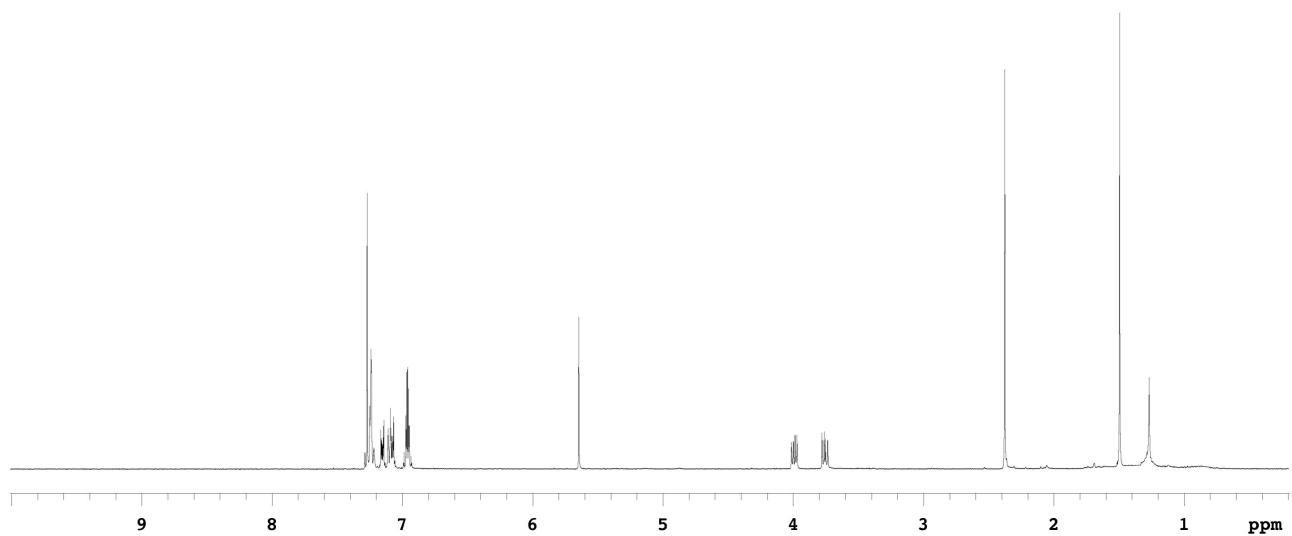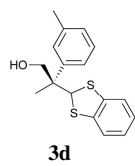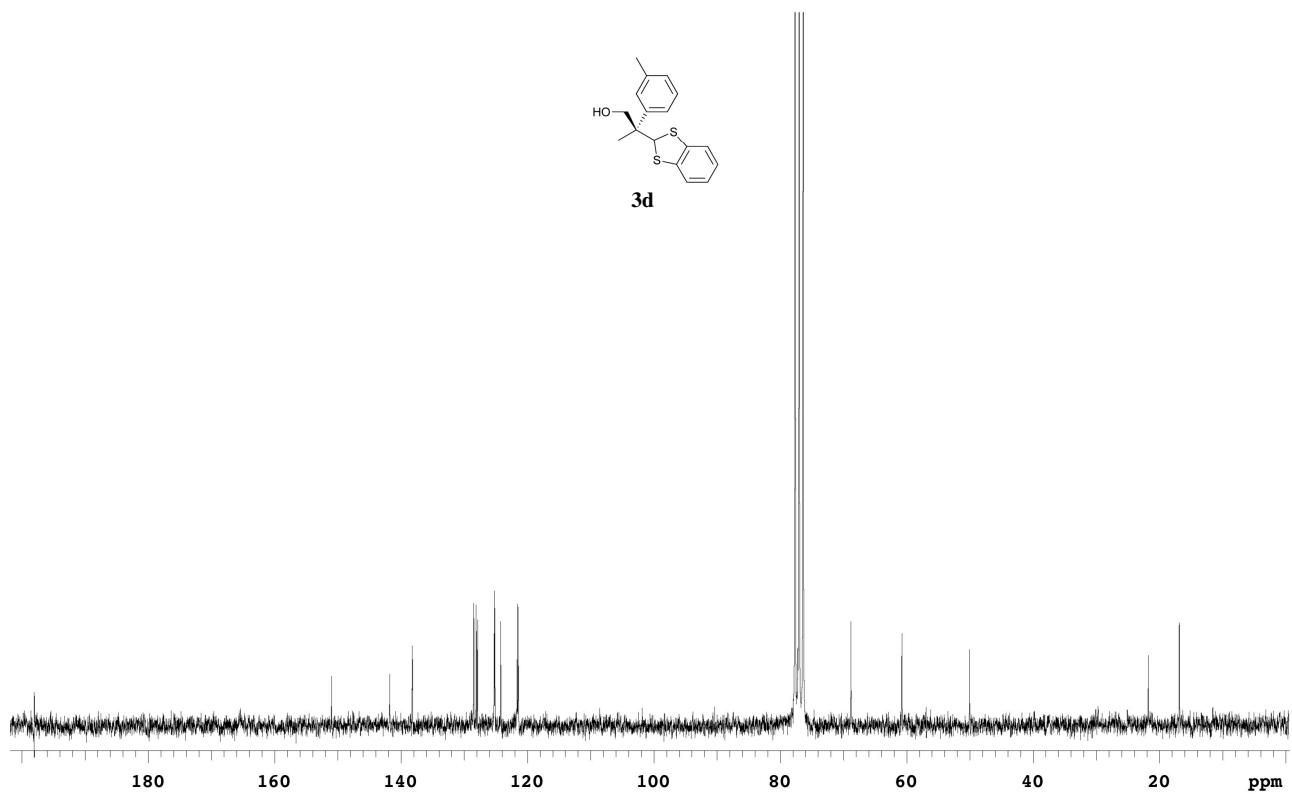

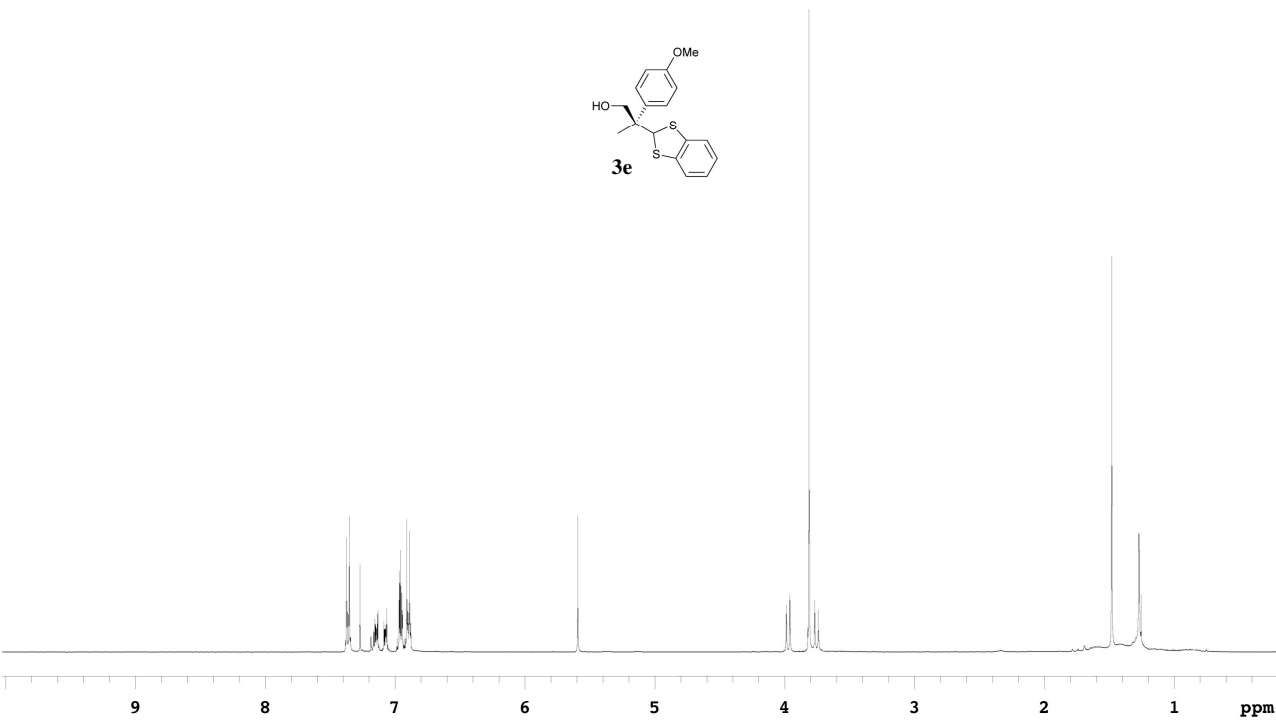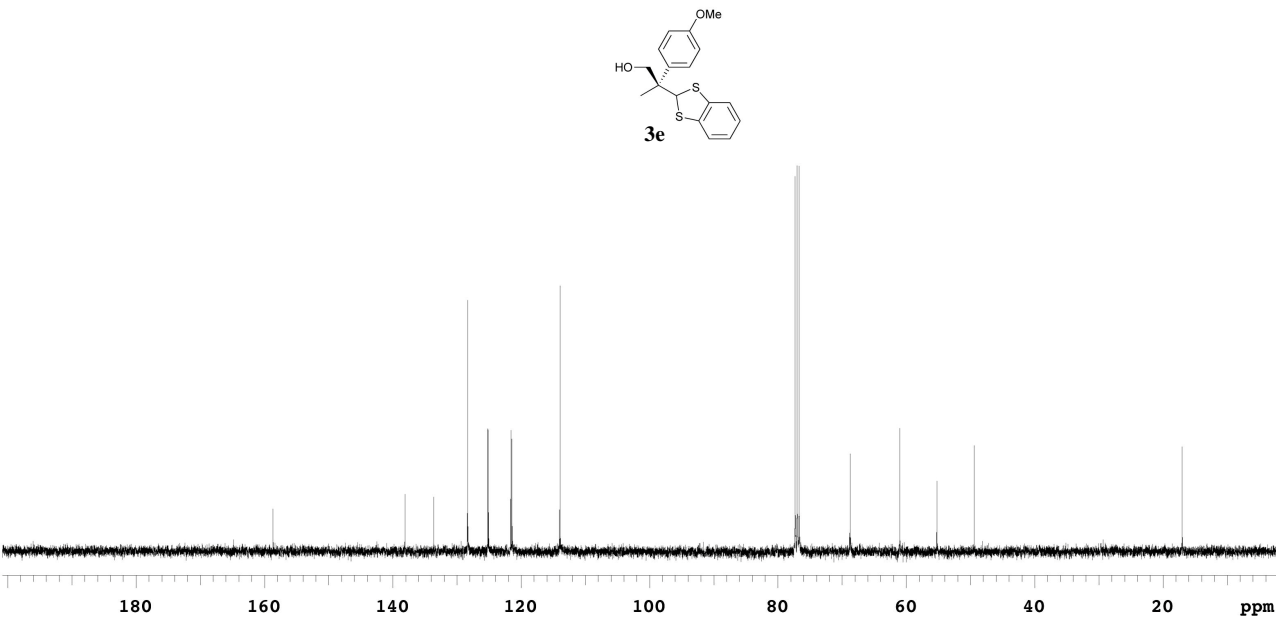

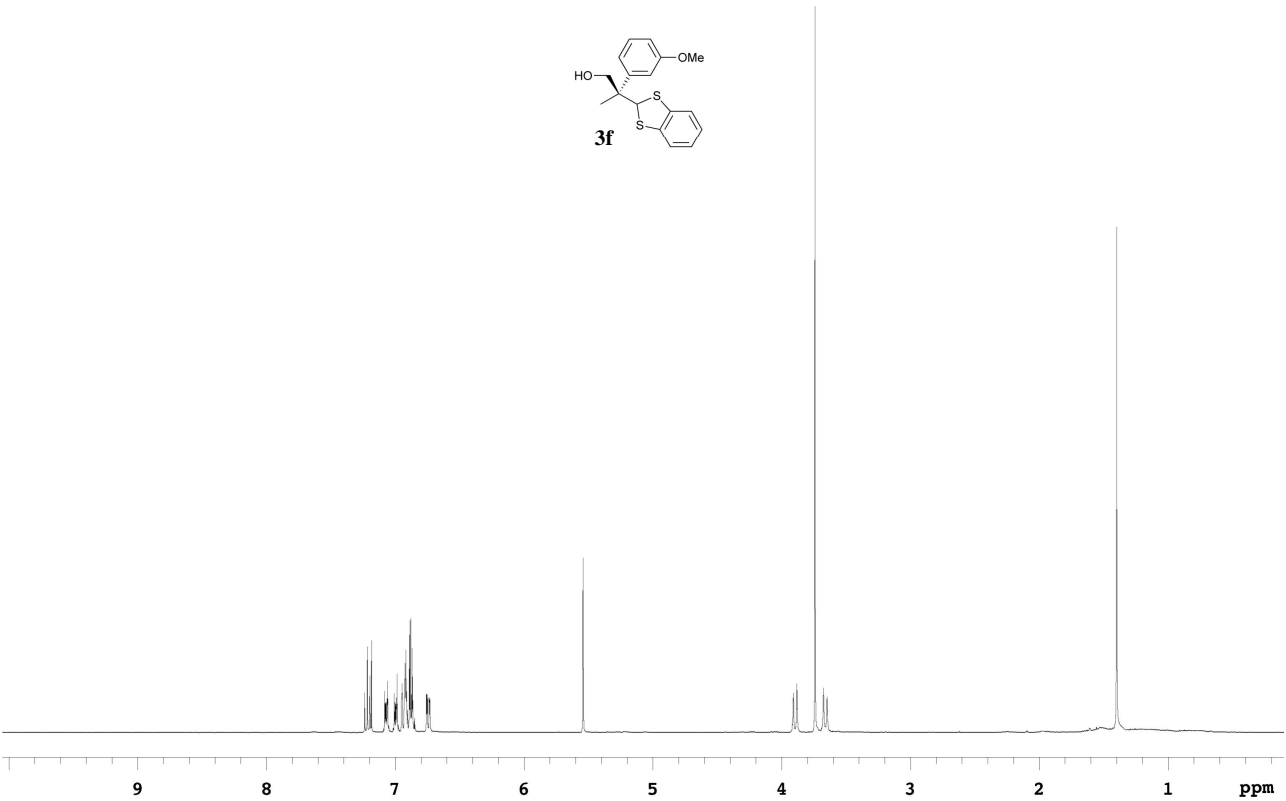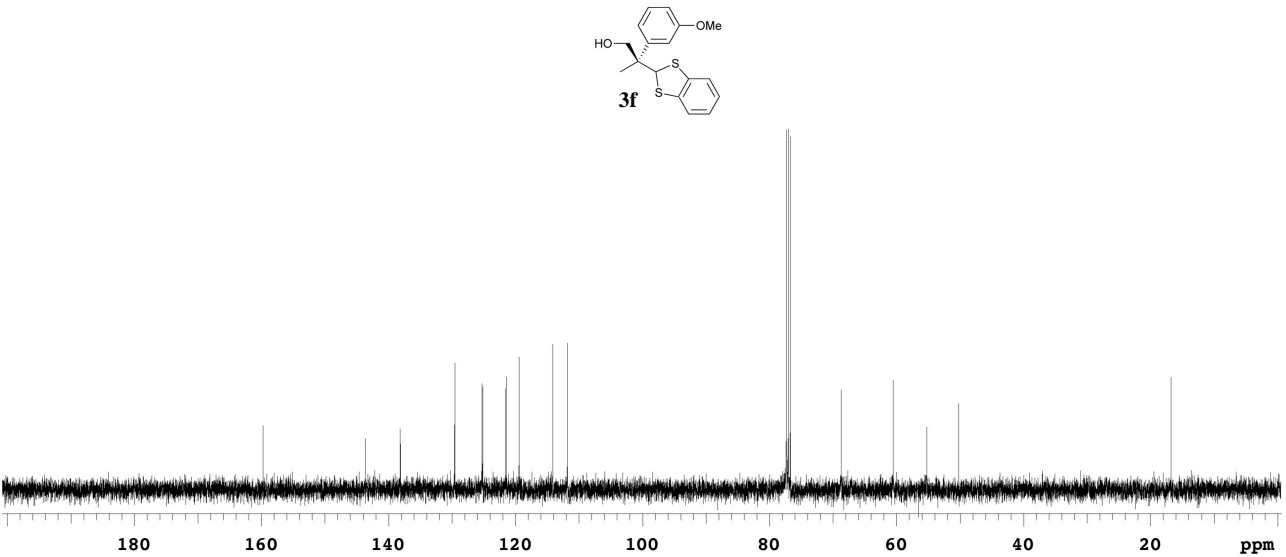

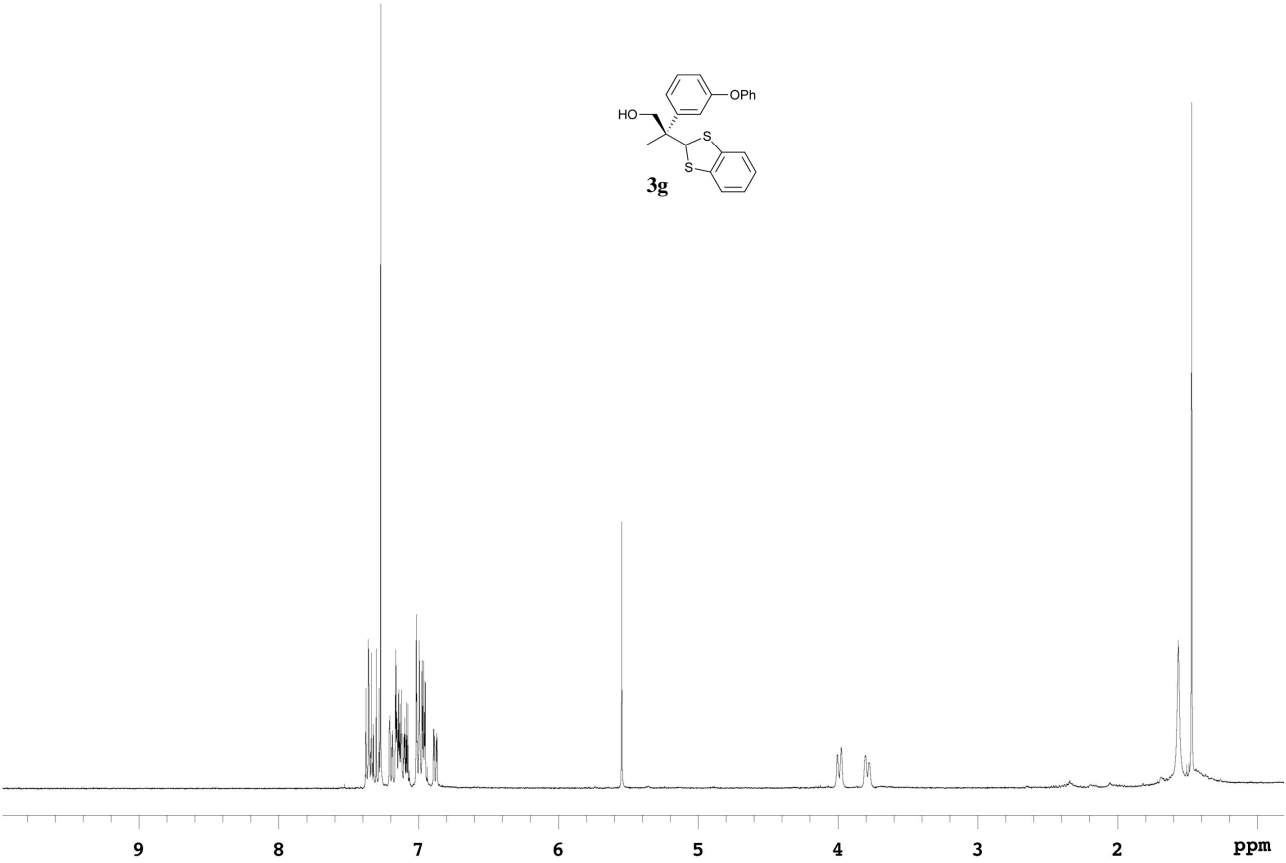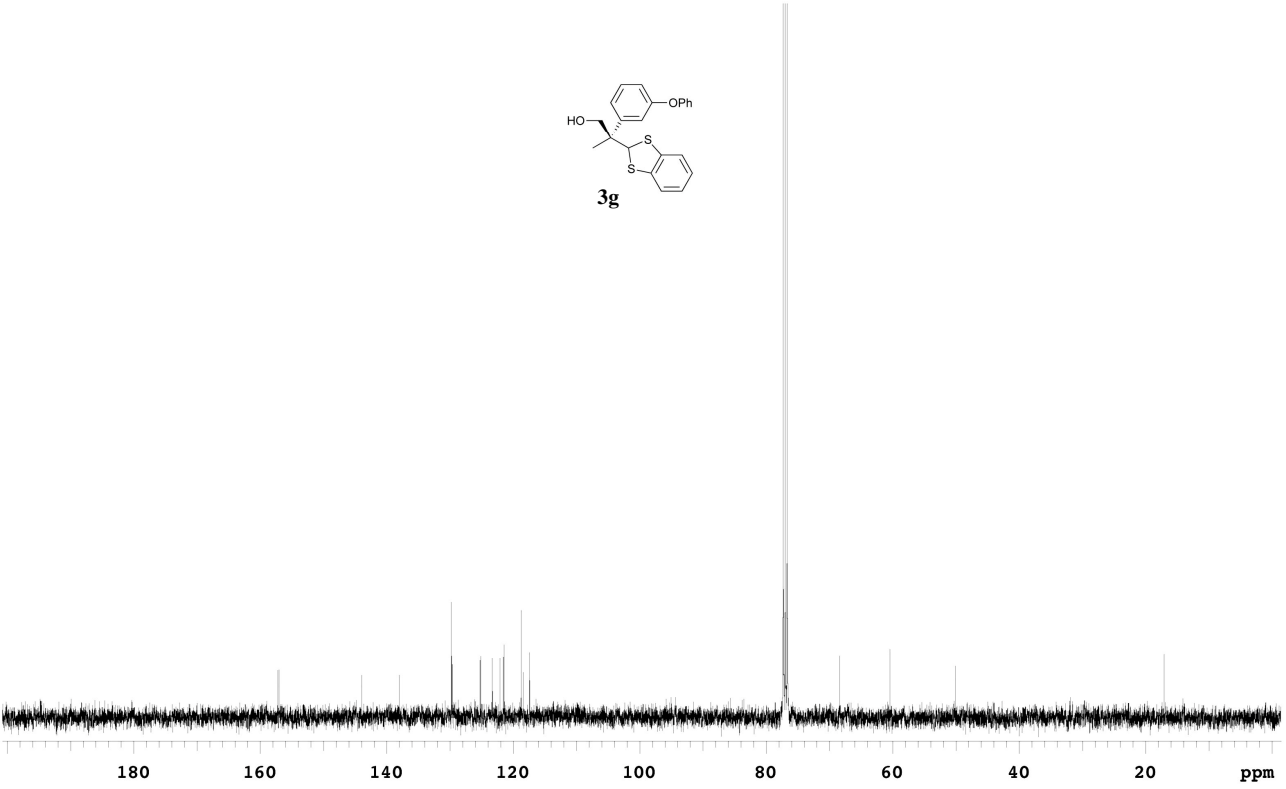



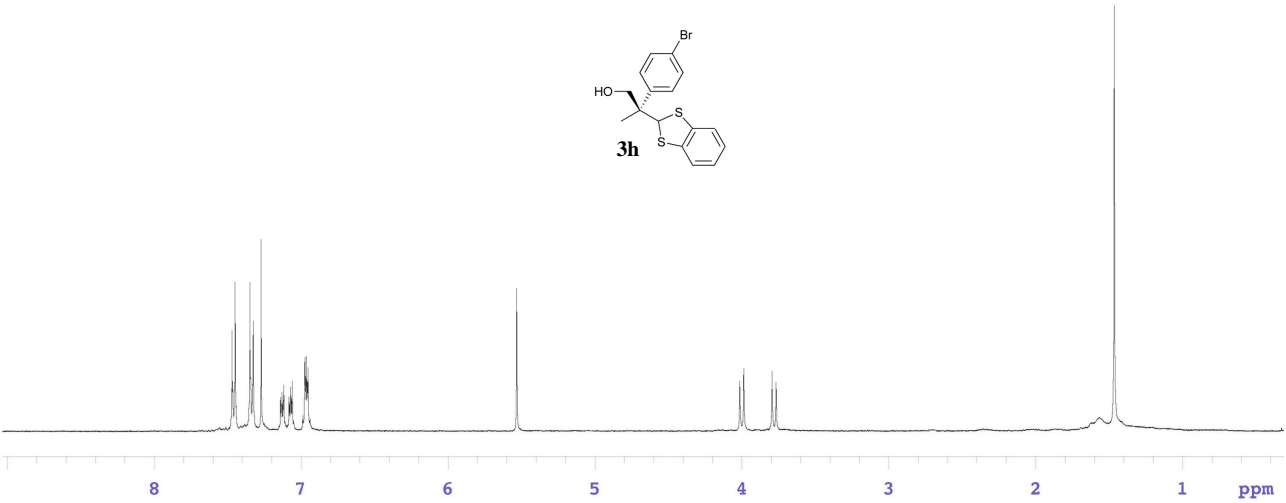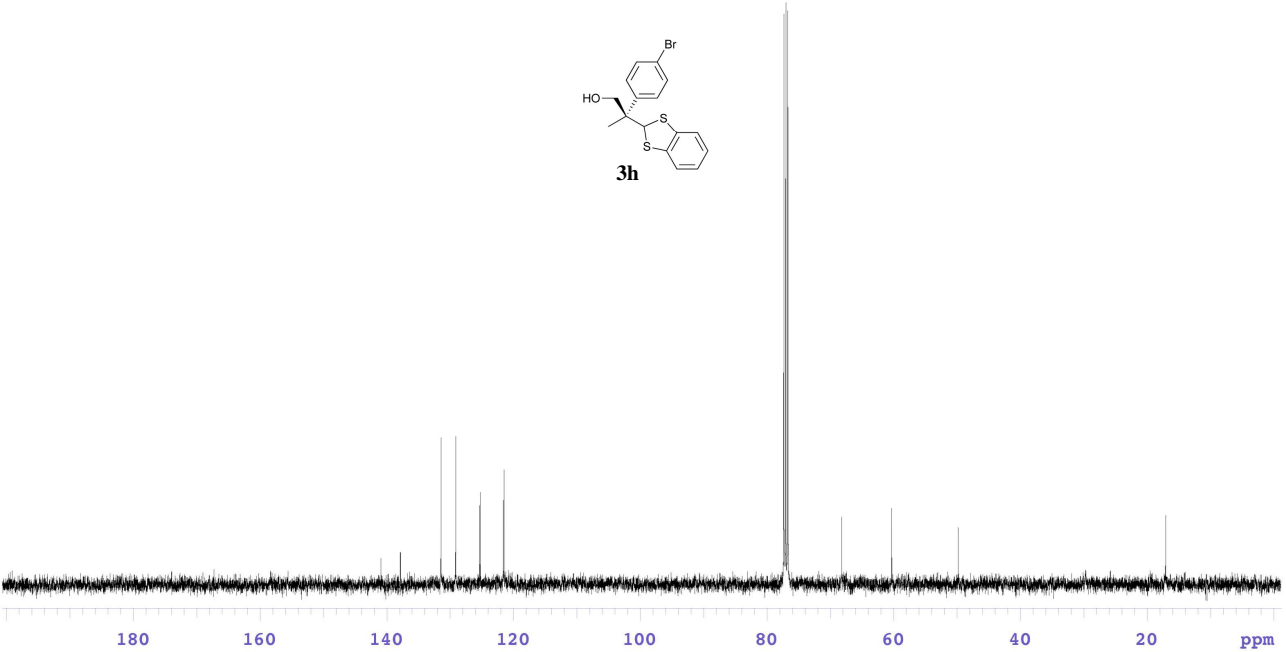

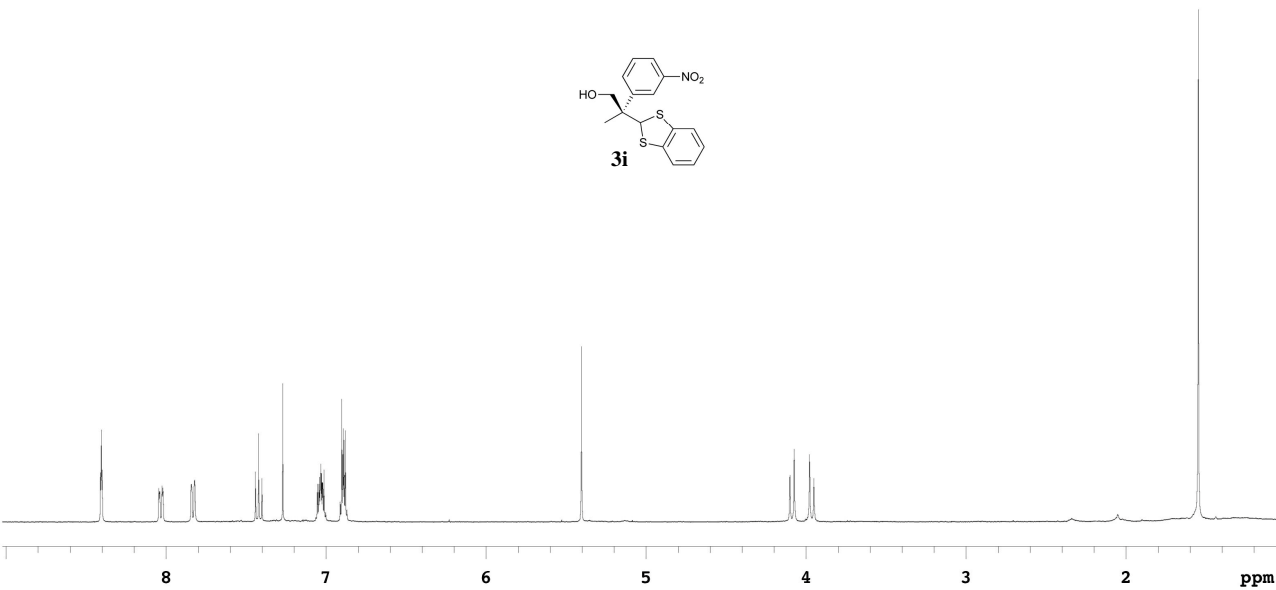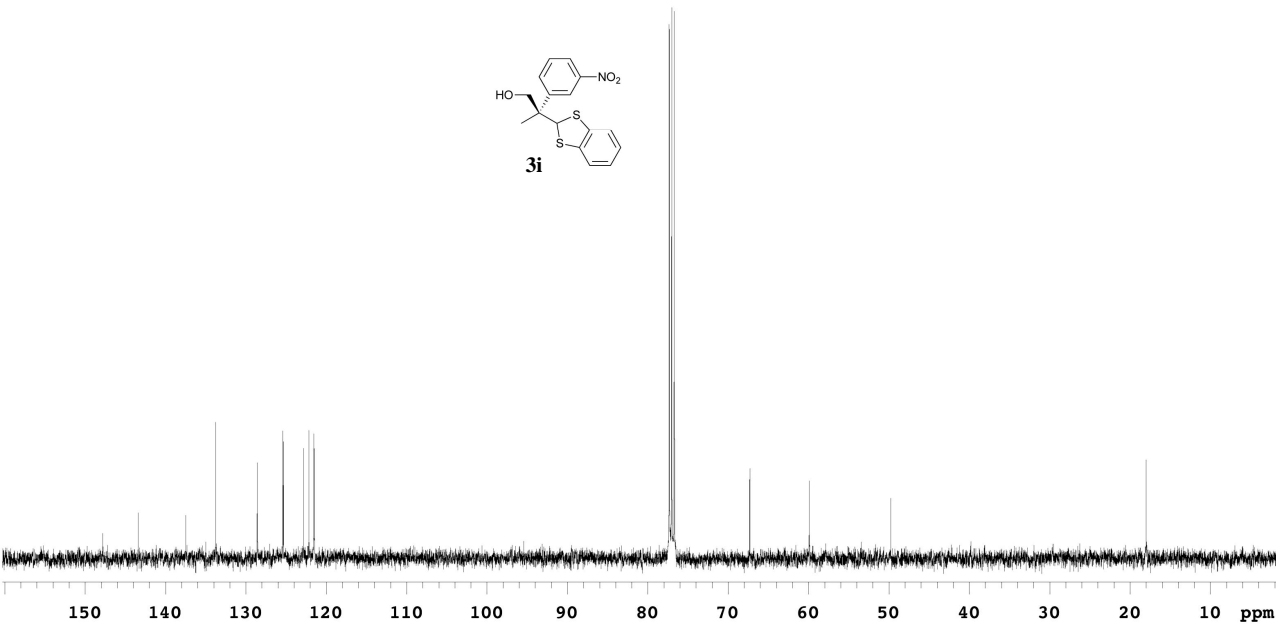

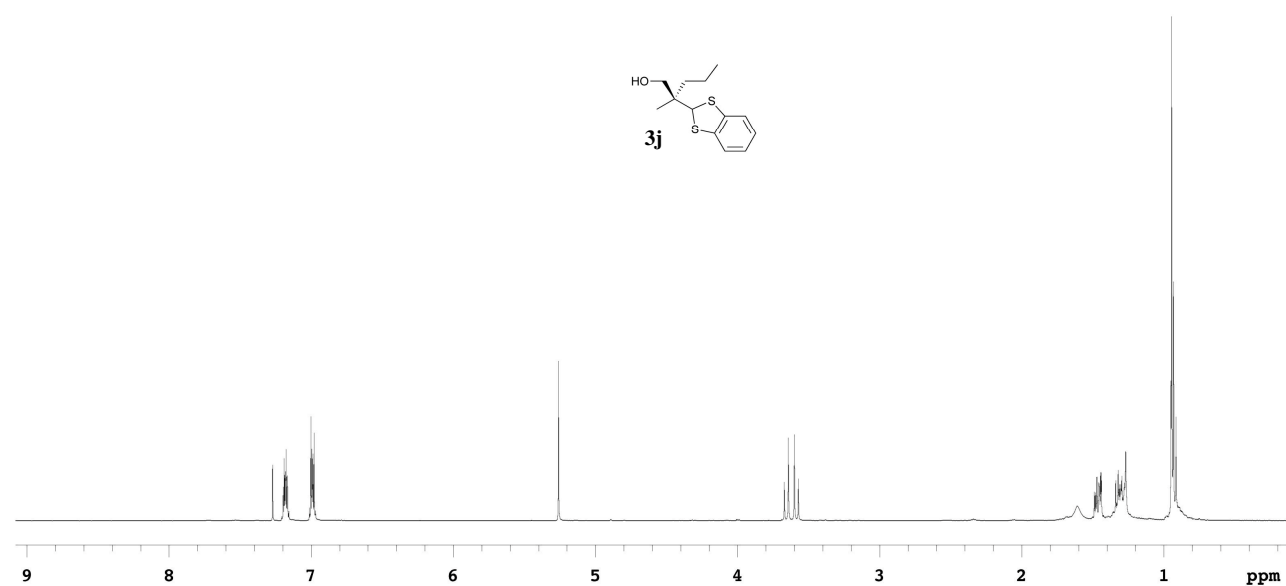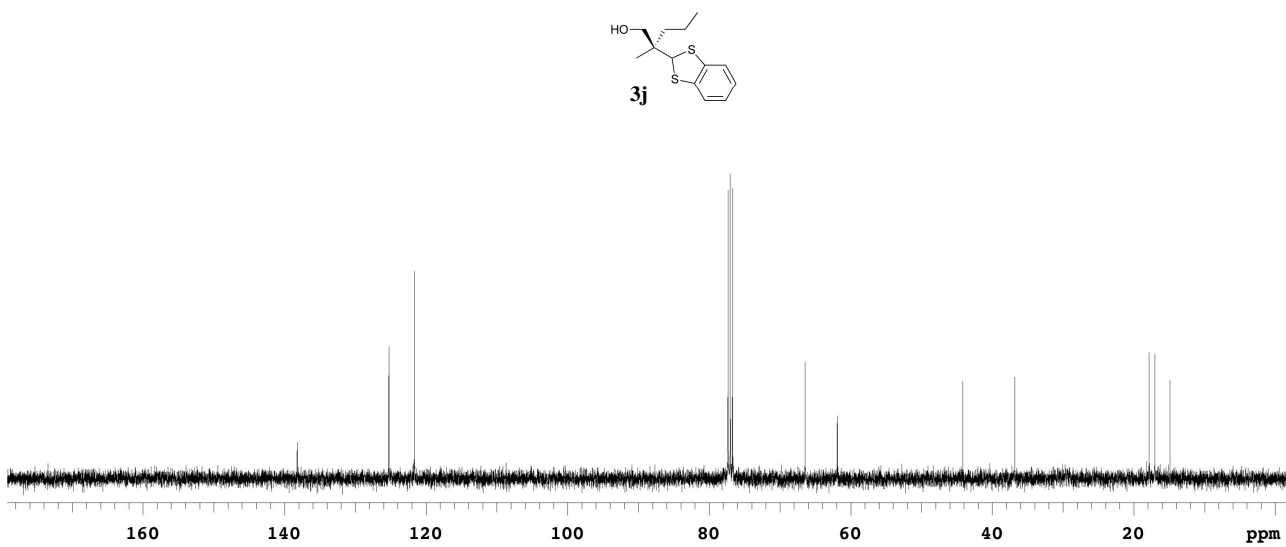

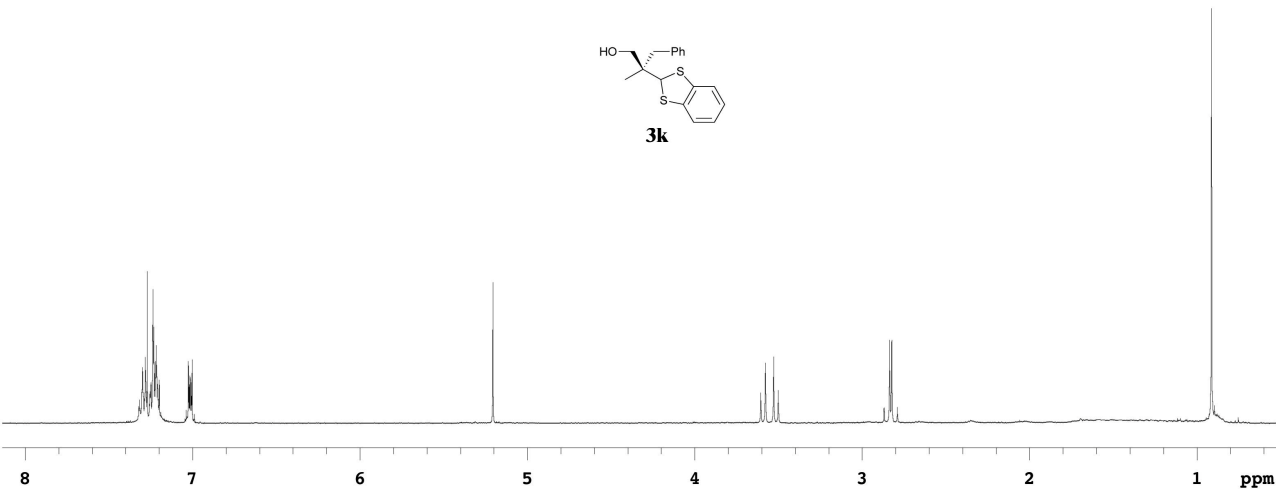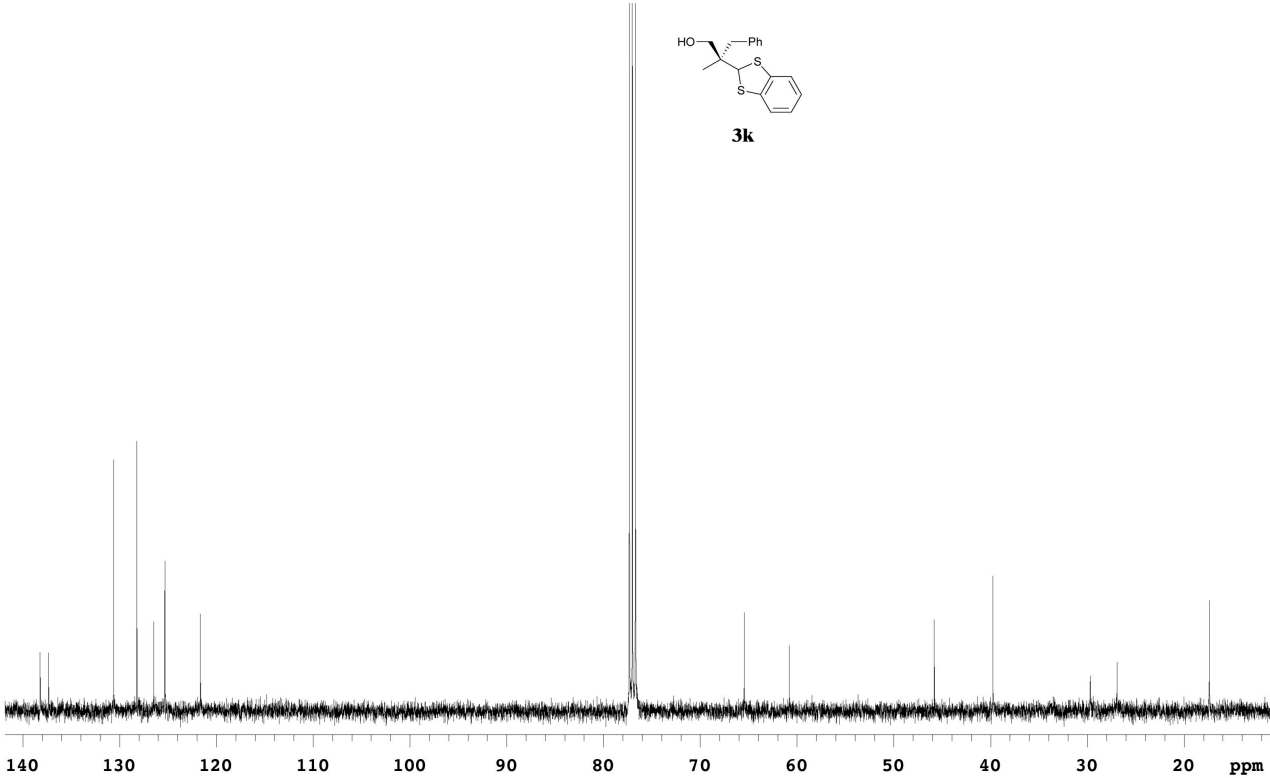

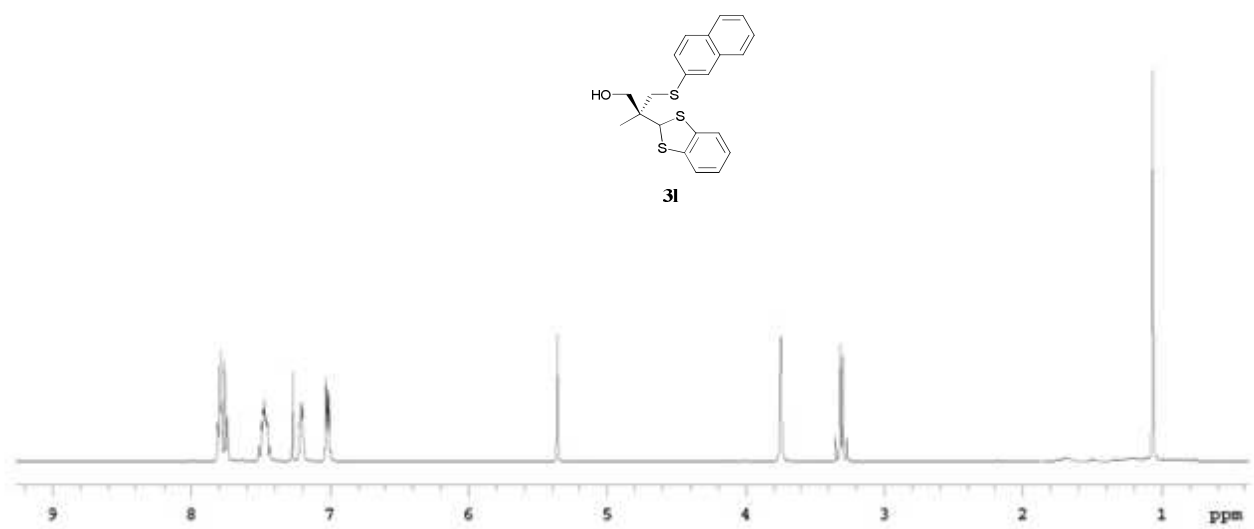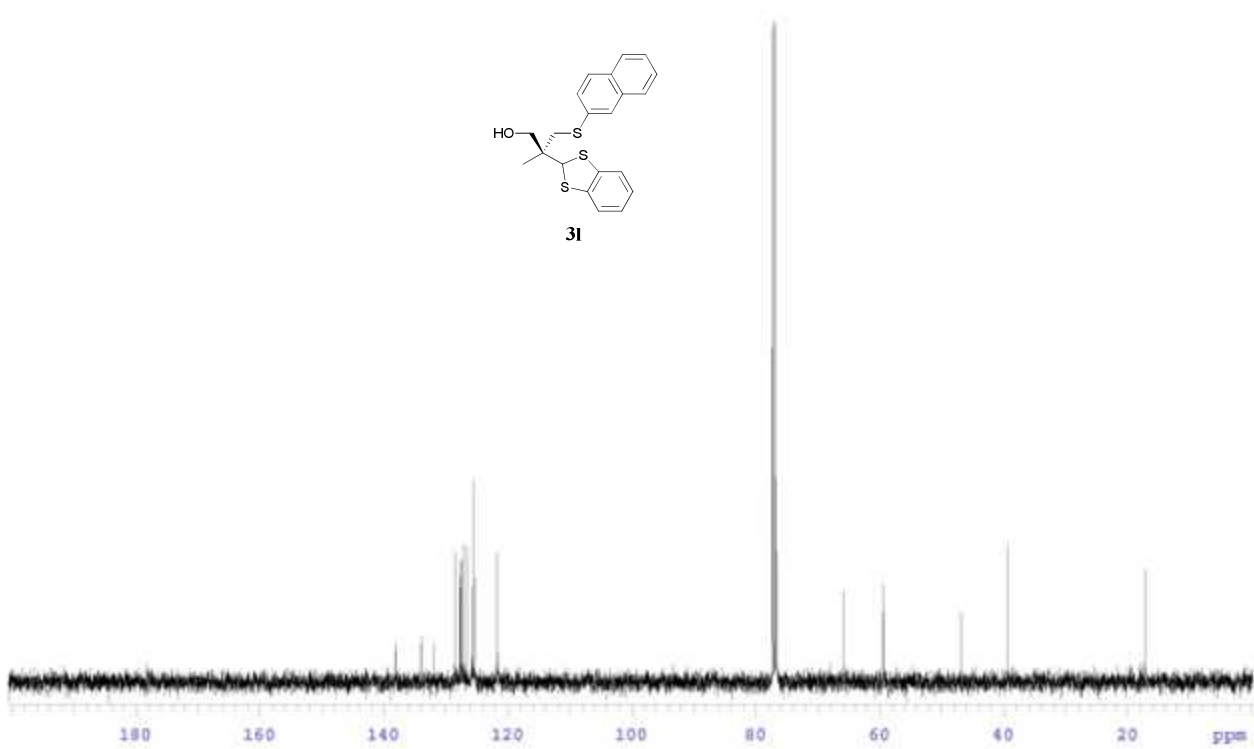

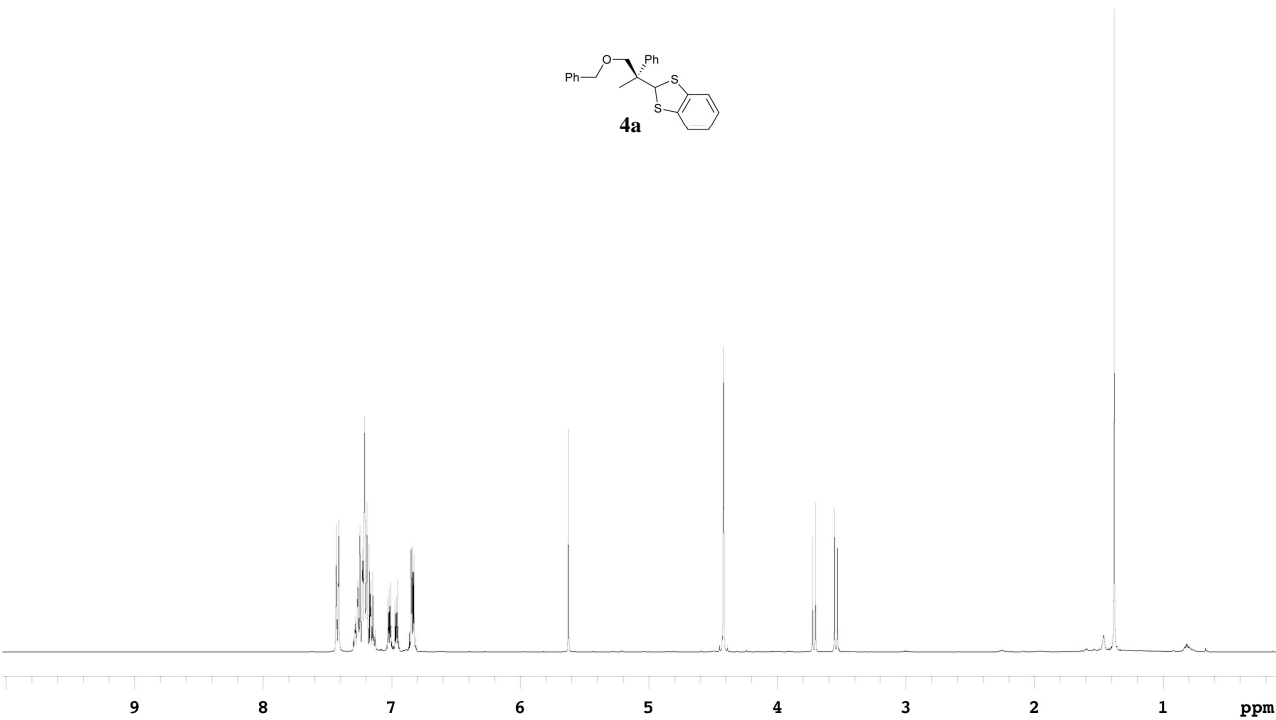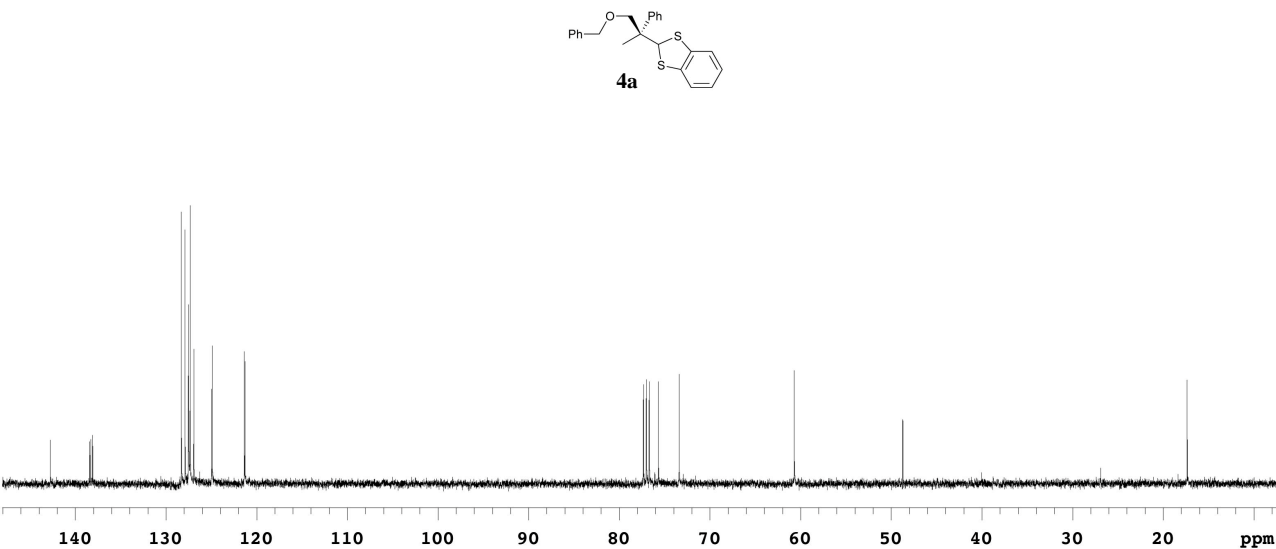

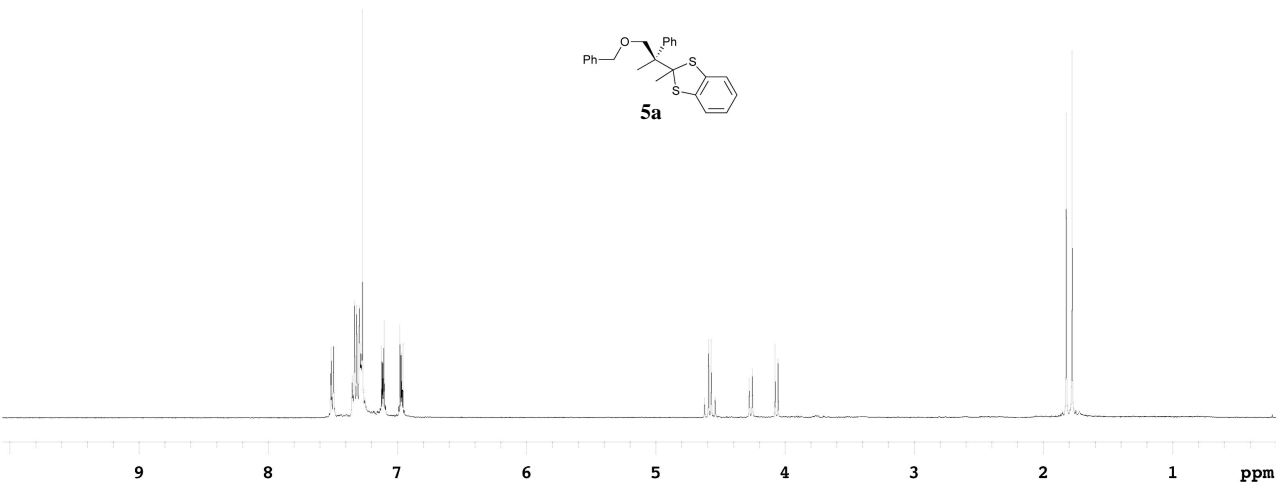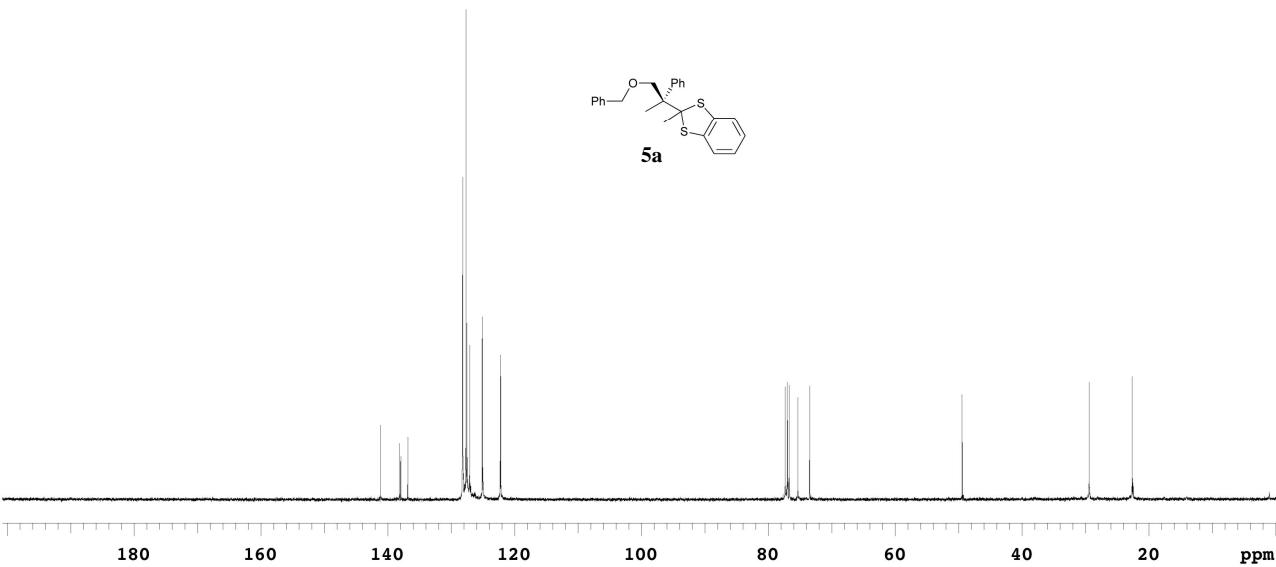

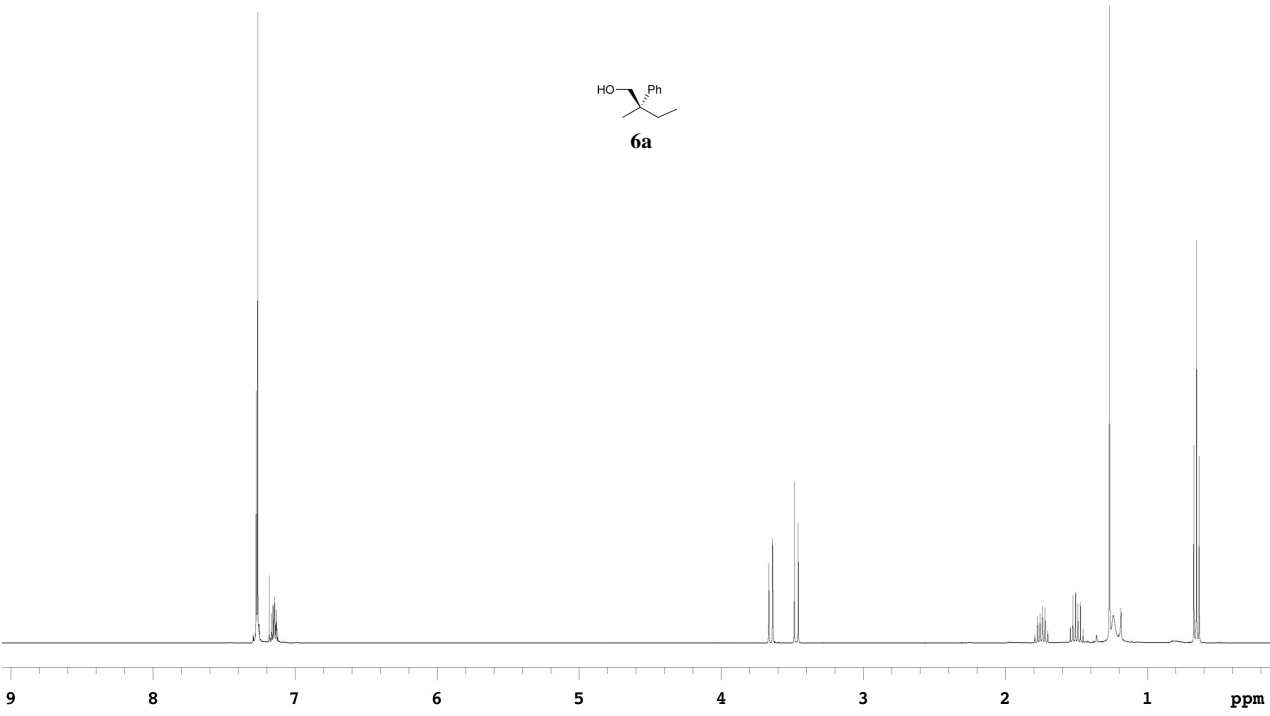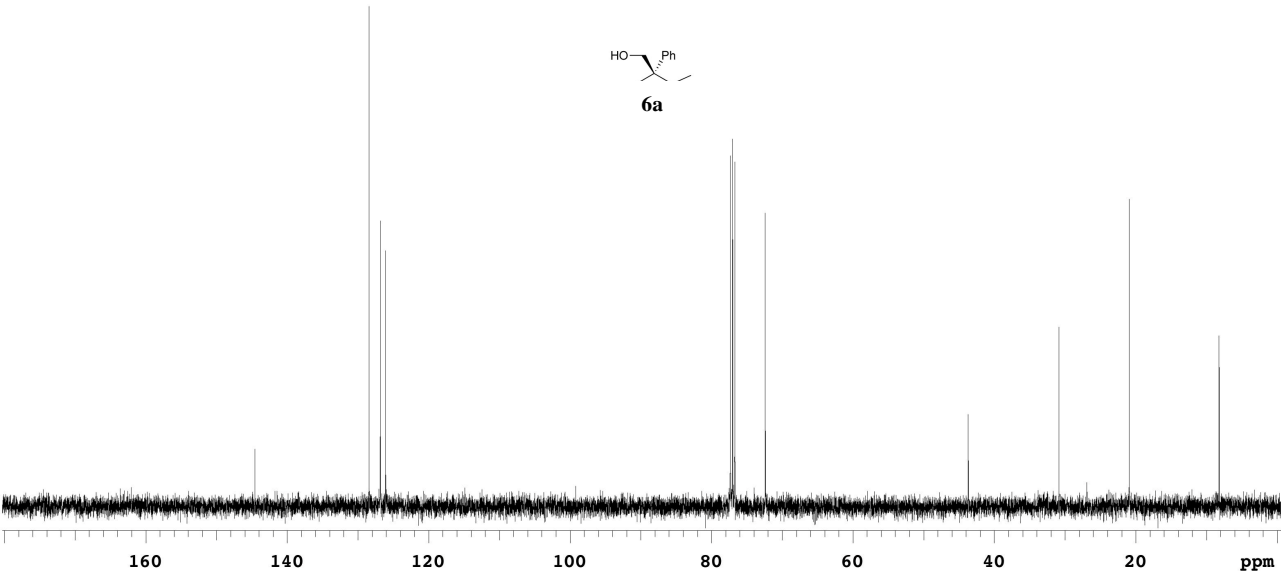



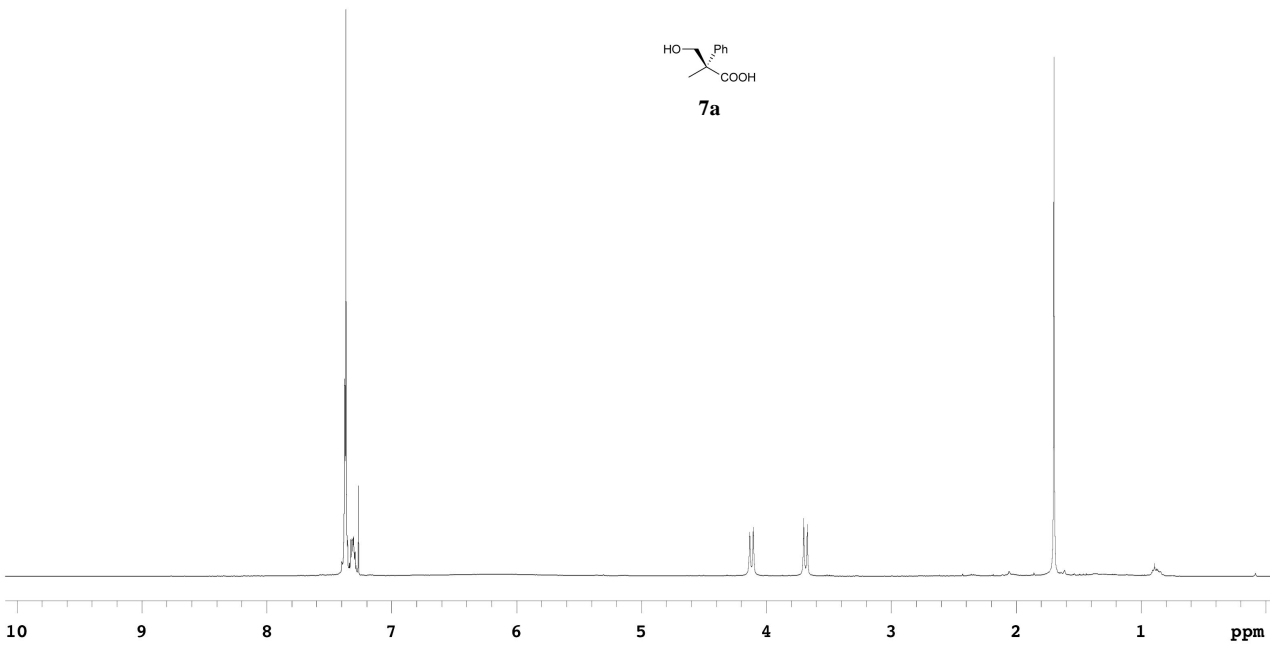

## HPLC Traces

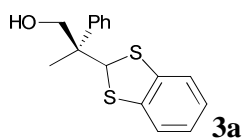

## Racemic

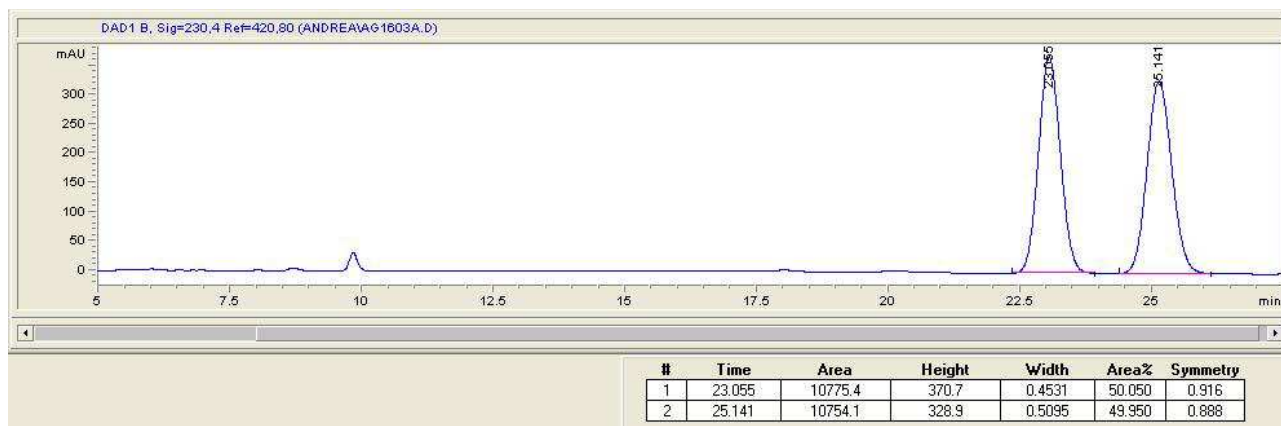

## Enantioselective

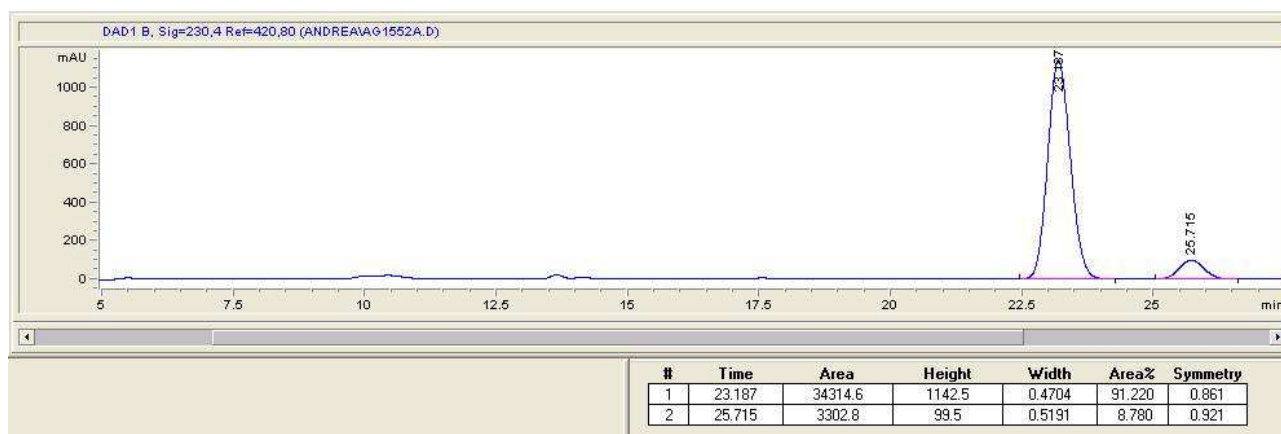

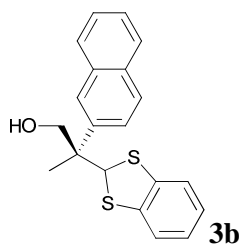

Racemic

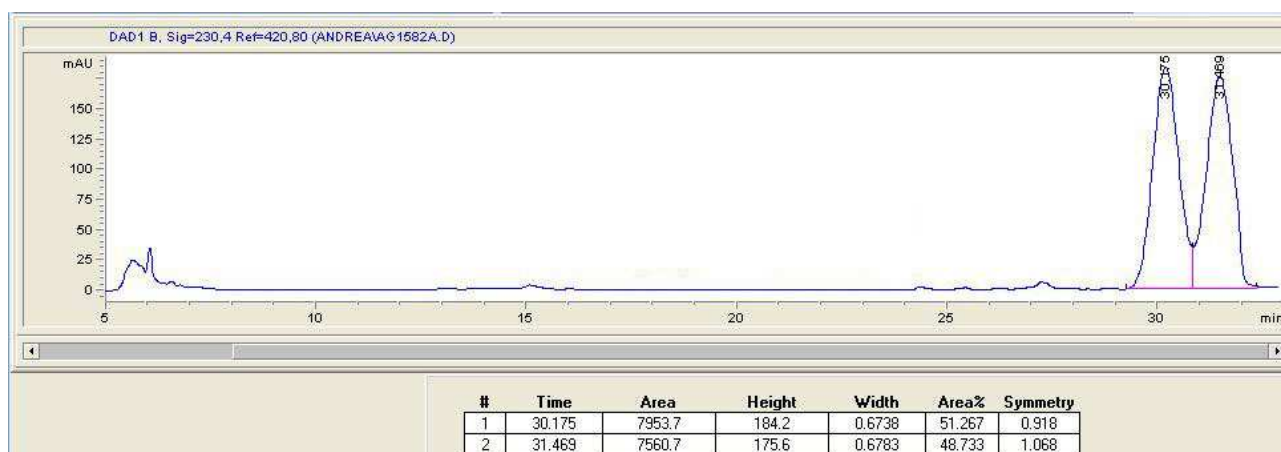

Enantioselective

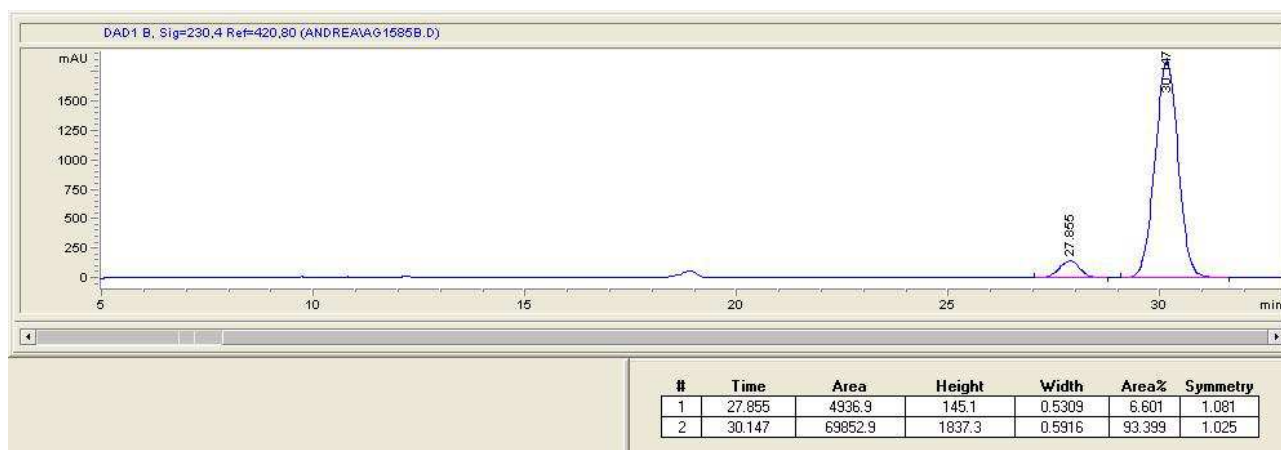

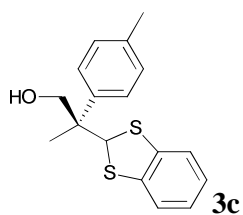

## Racemic

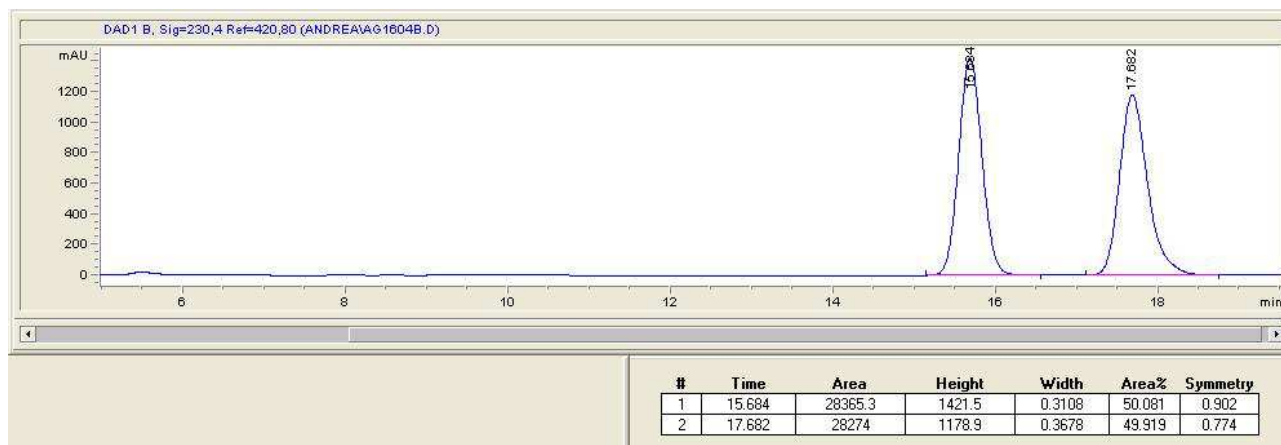

## Enantioselective

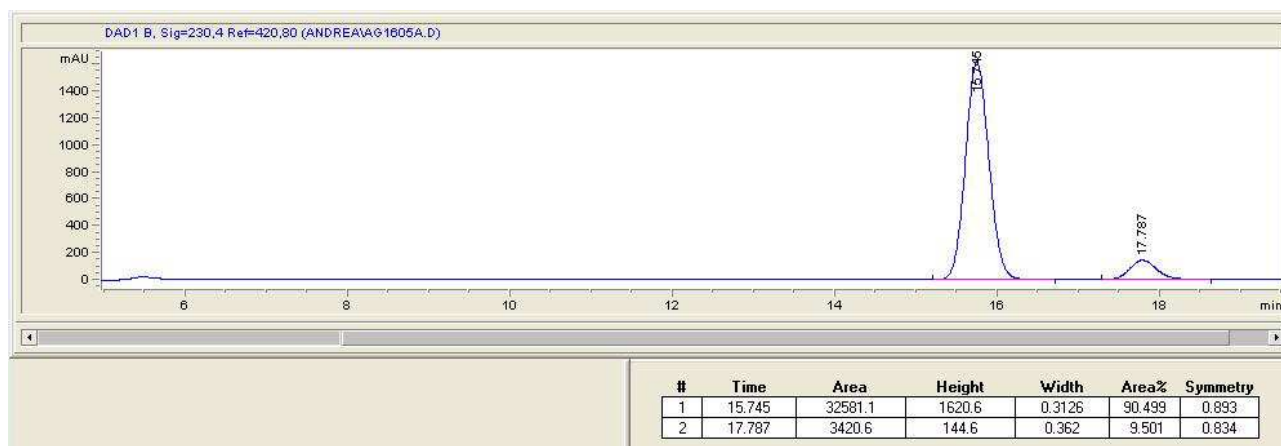

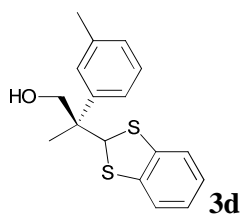

Racemic

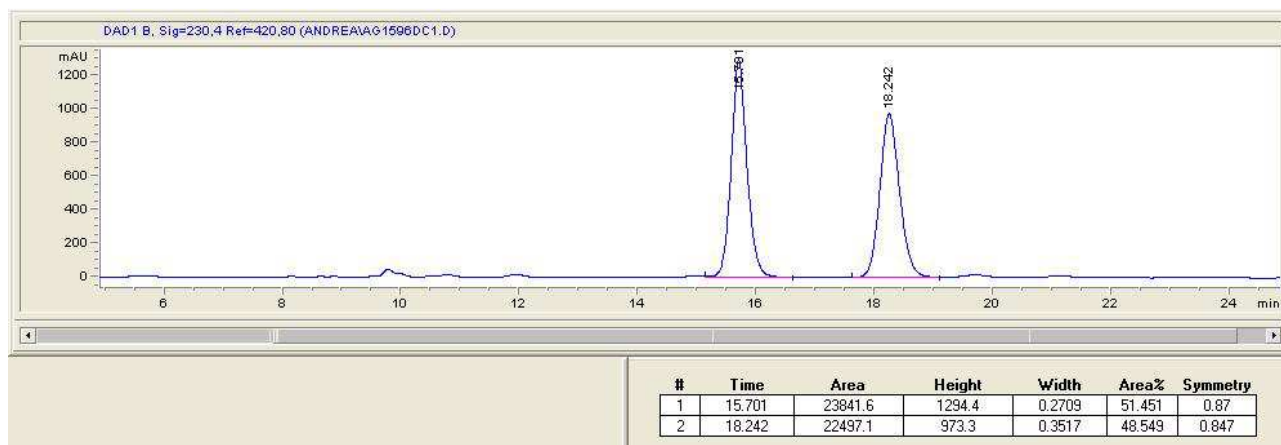

Enantioselective

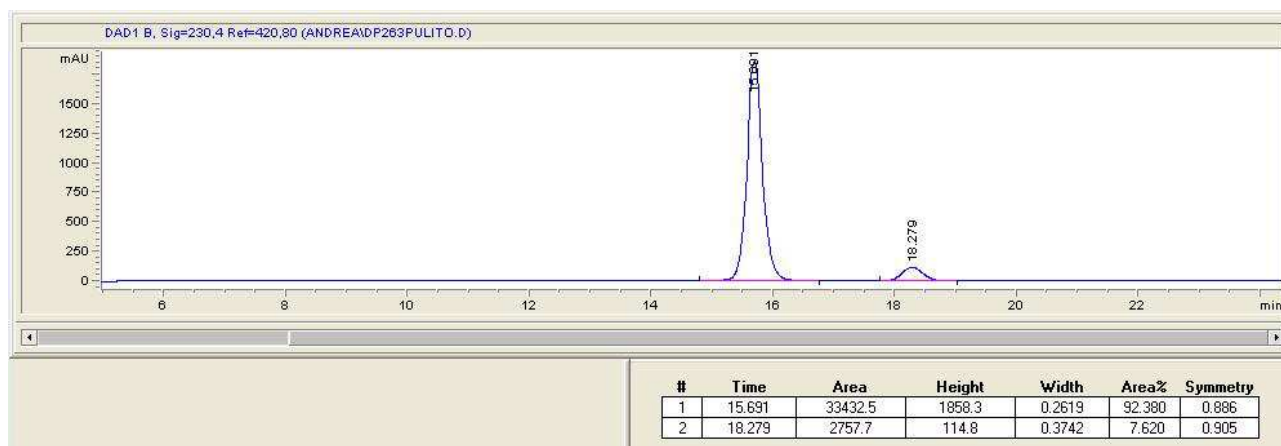

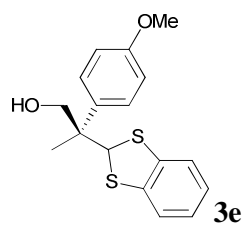

## Racemic

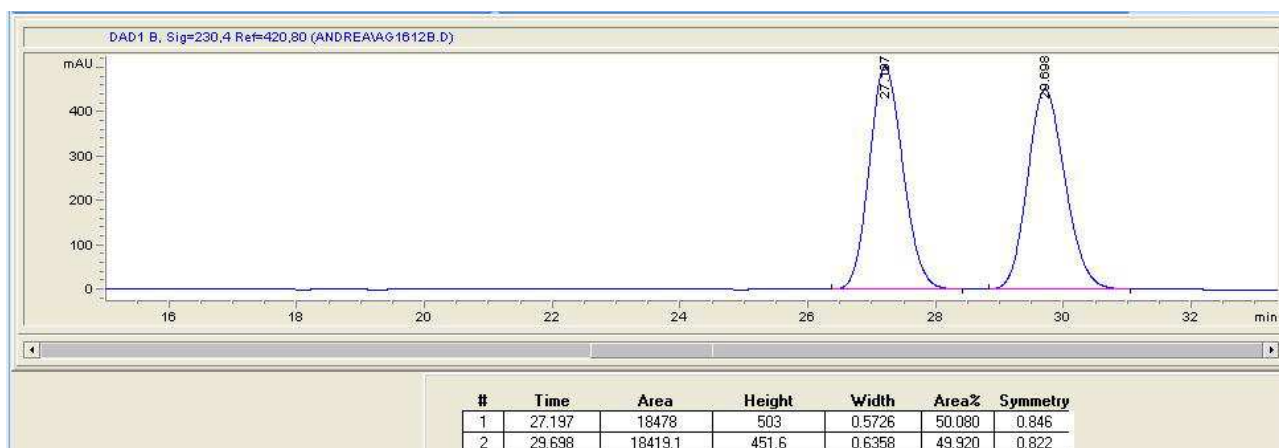

## Enantioselective

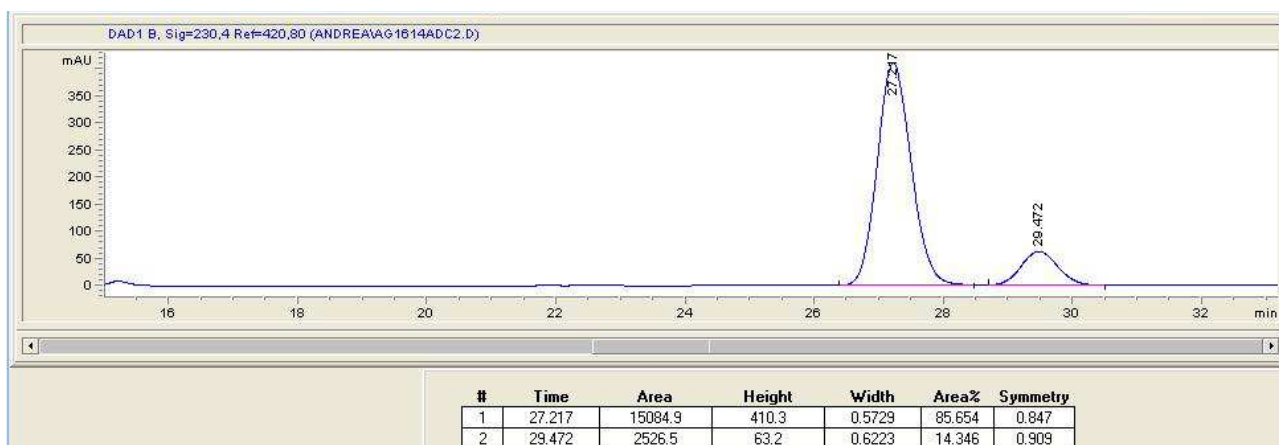

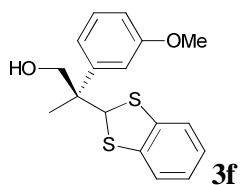

## Racemic

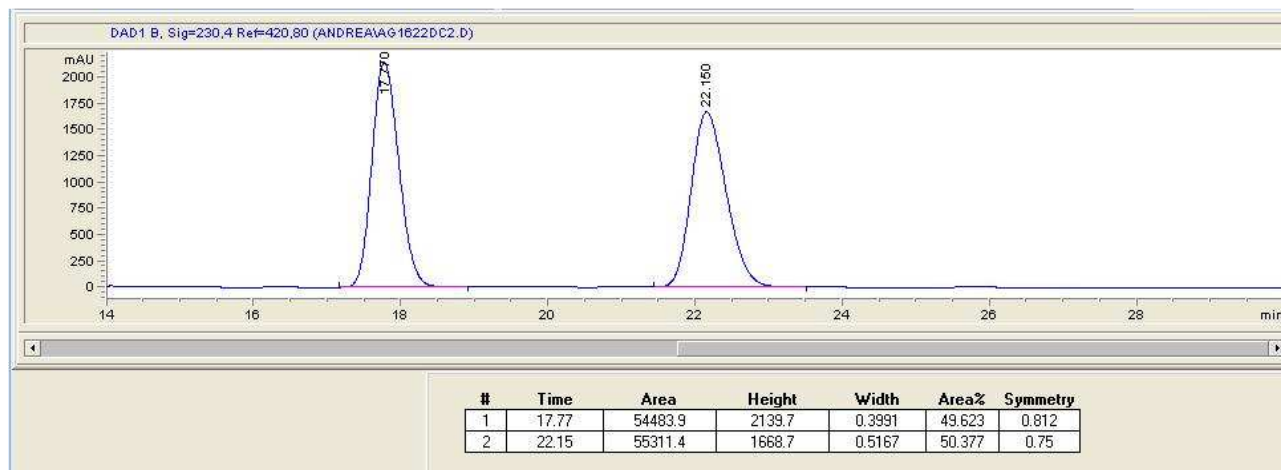

## Enantioselective

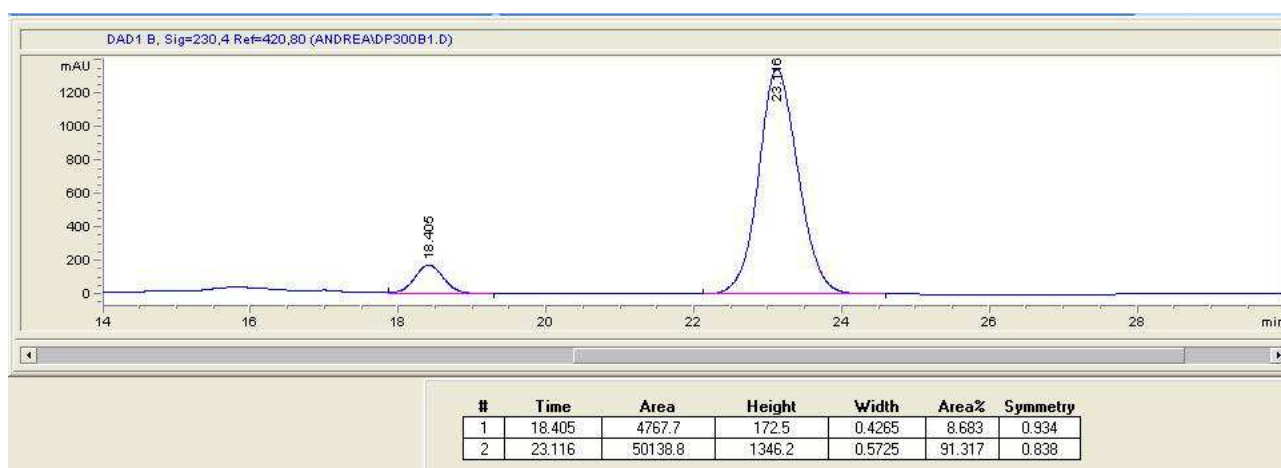

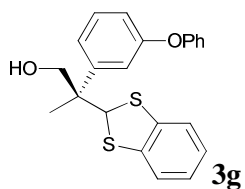

## Racemic

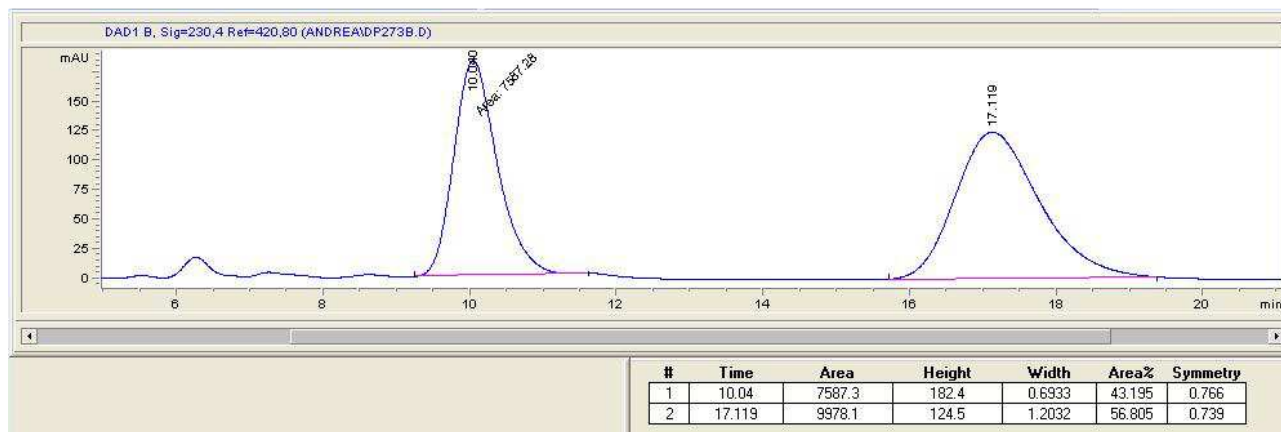

## Enantioselective

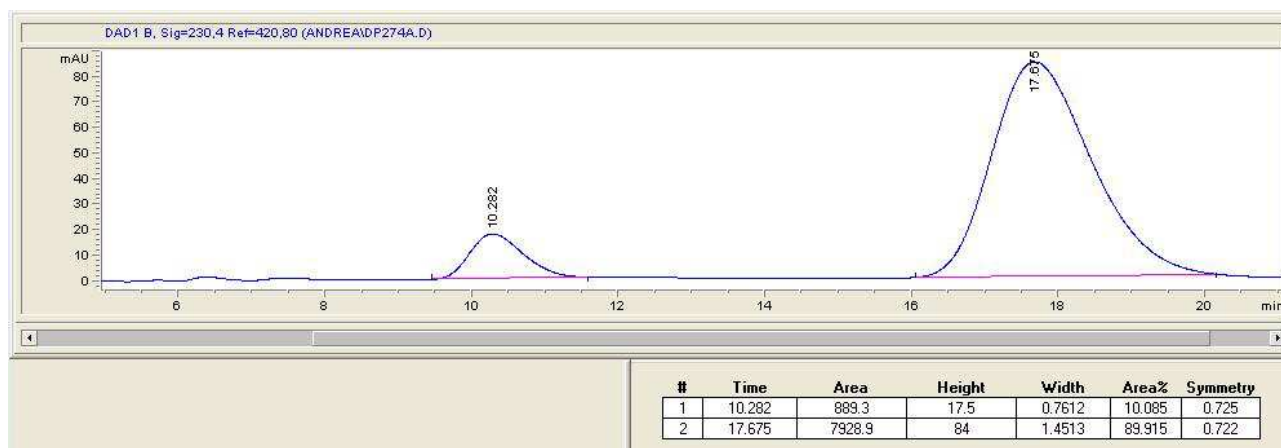



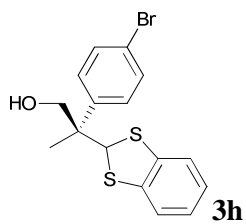

Racemic

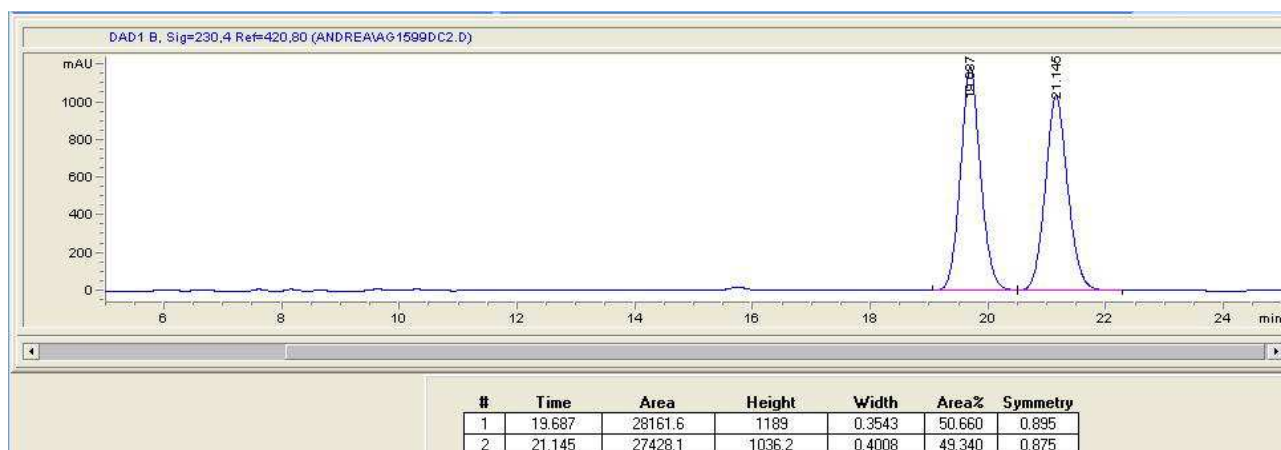

Enantioselective

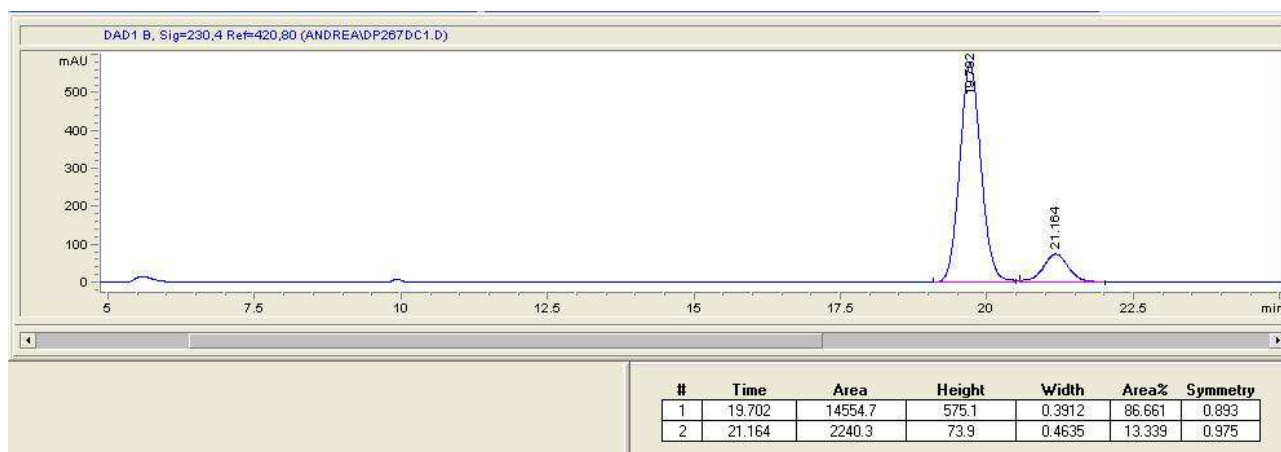

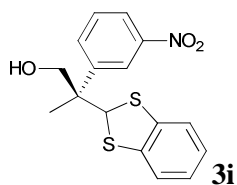

## Racemic

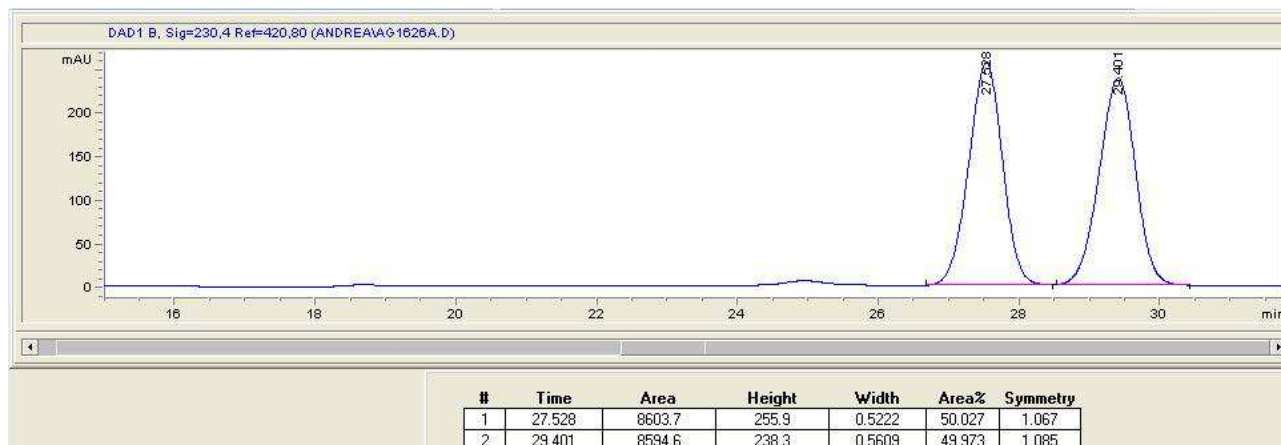

## Enantioselective

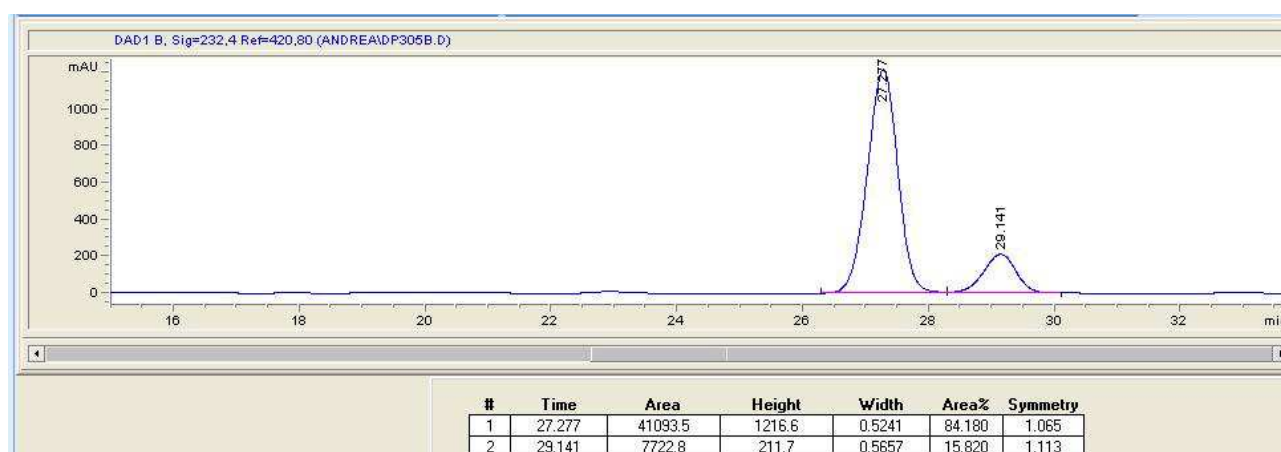

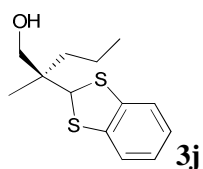

Racemic

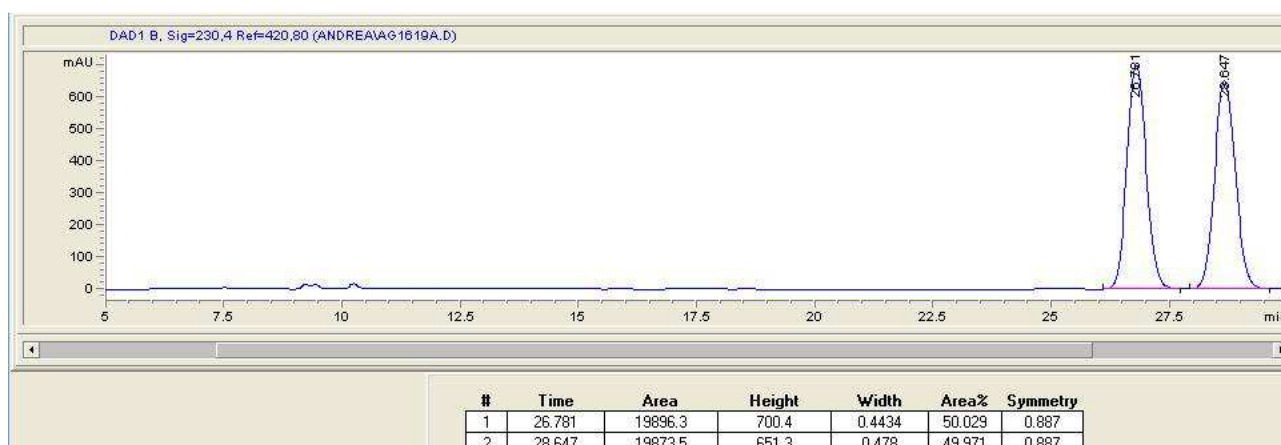

Enantioselective

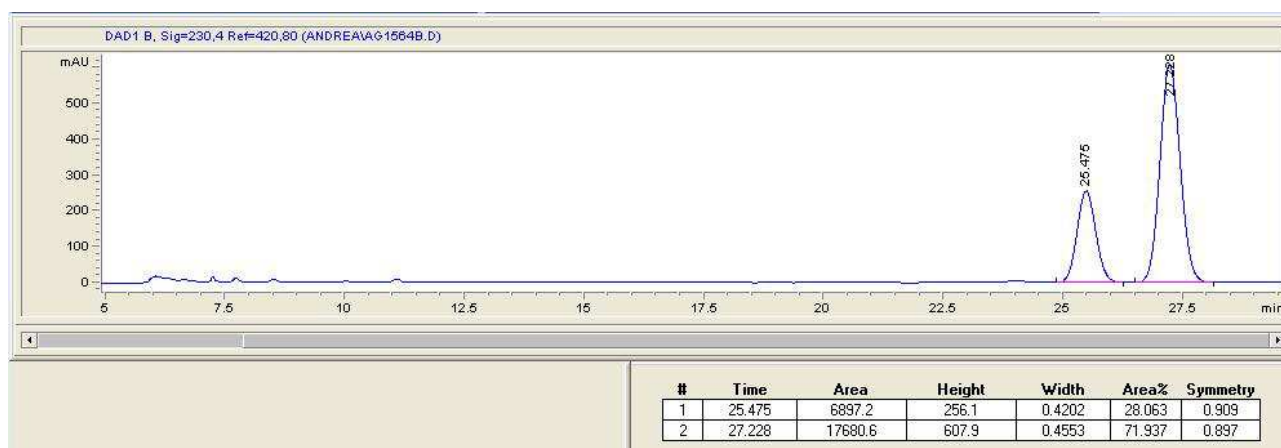

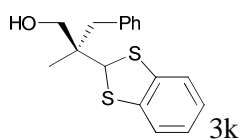

## Racemic

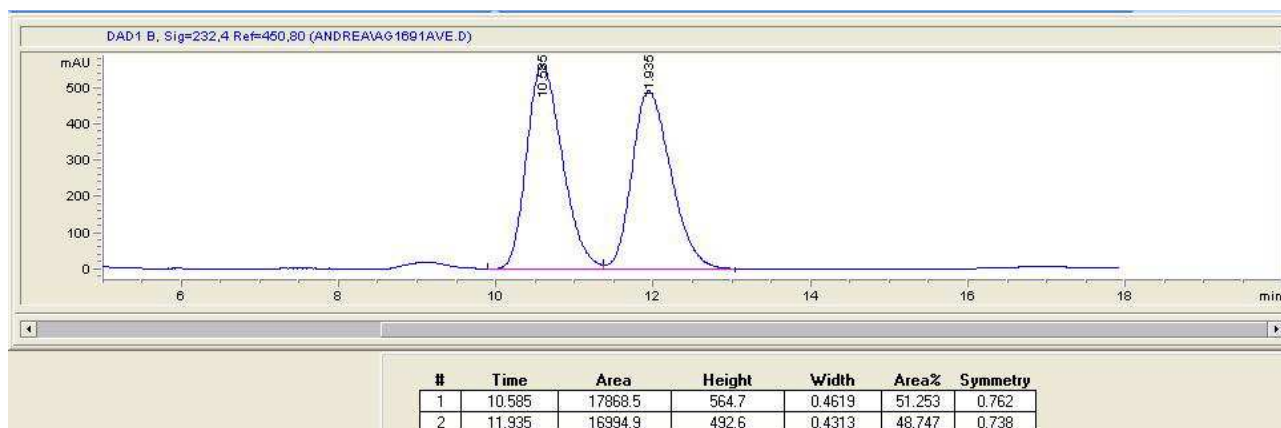

## Enantioselective

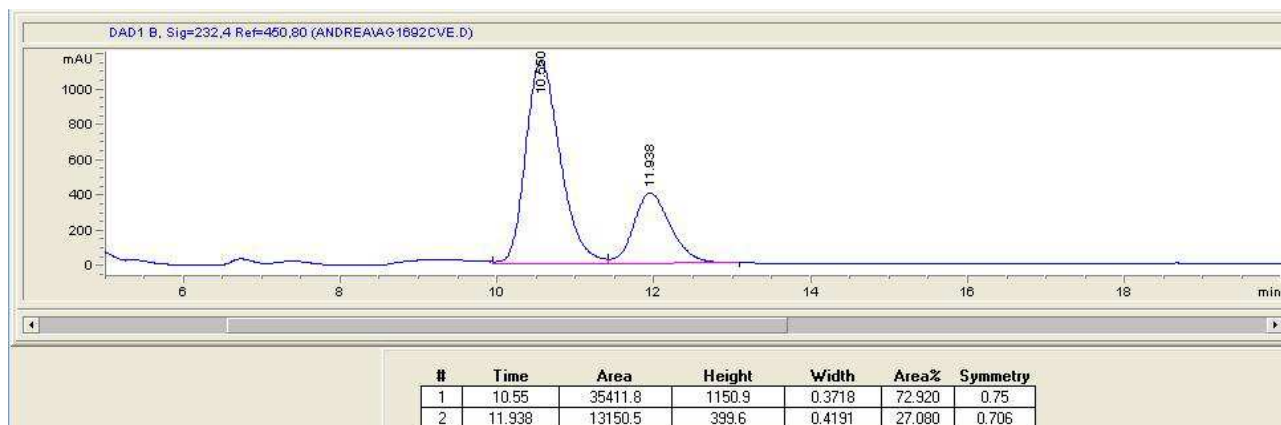

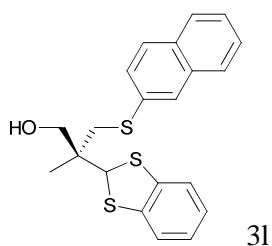

31

## Racemic

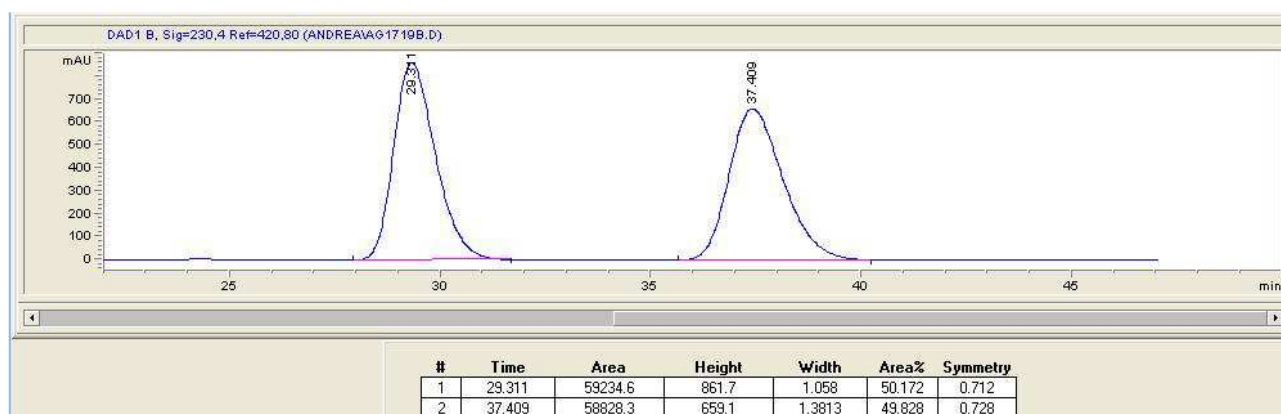

## Enantioselective

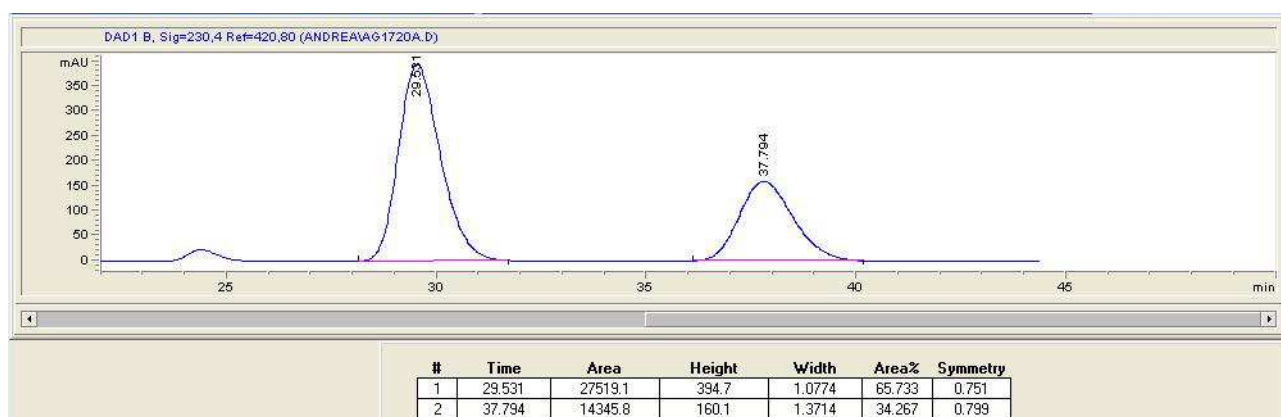

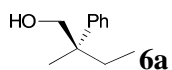

Racemic

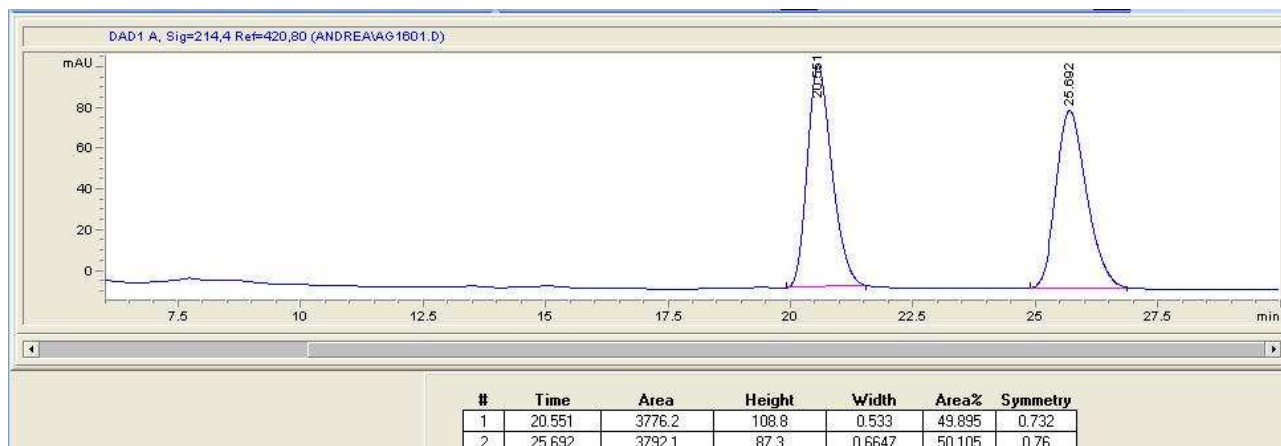

Enantioselective

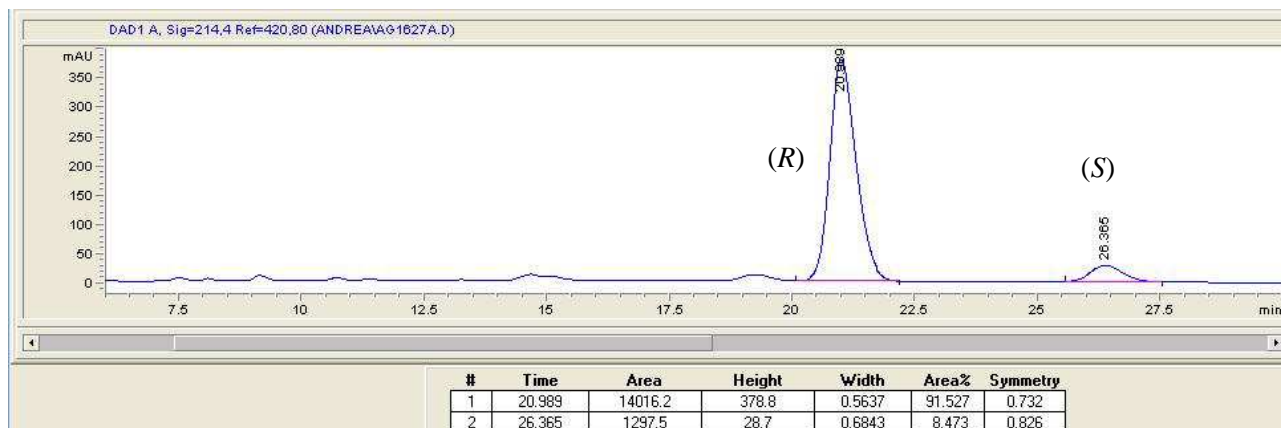

Supplement: c2cc17482k.pdf [file c2cc17482k.pdf]
